# Supplementary material
Source: PubMed Central journal article supplement (PMC4177368)
Supplement: NIHMS625070-supplement-01.pdf [file NIHMS625070-supplement-01.pdf]

Supplemental Information Inventory

**A Mitochondrial ATP synthase Subunit Interacts  
with TOR Signaling to Modulate Protein Homeostasis  
and Lifespan in Drosophila**

Xiaoping Sun<sup>1</sup>, Charles T. Wheeler<sup>1</sup>, Jason Yolitz<sup>1</sup>, Mara Laslo<sup>1</sup>, Thomas Alberico<sup>1</sup>,  
Yaning Sun<sup>1</sup>, Qisheng Song<sup>2</sup> and Sige Zou<sup>1,\*</sup>

<sup>1</sup>Translational Gerontology Branch, National Institute on Aging, Baltimore, MD 21224,  
USA; <sup>2</sup>Division of Plant Sciences, University of Missouri, Columbia, MO 65211, USA

This manuscript includes the following supplemental materials:

1. Supplemental Materials and Methods, related to the materials and methods in the main text.
2. Figure S1. The Effect of ATPsyn-d Knockdown and Overexpression on Lifespan and Stress Response, Related to Figure 1 and 2.
3. Figure S2. The Effect of RU486 Alone on the Lifespan of Flies Fed SY1:1, SY1:9, SY9:1 or Cornmeal Diet, Related to Figure 1 and 2.
4. Figure S3. The Effect of ATPsyn-d Knockdown on Food Intake, Locomotor Activity and Reproduction, Related to Figure 1, 2 and 6.
5. Figure S4. The Effect of RU486 Feeding on Gene Expression, Related to Figure 3 and 4.
6. Figure S5. The Effect of ATPsyn-d Knockdown or RU486 Feeding Alone on Stress Response, Mitochondrial and Metabolism Function in Females, Related to Figure 4.

7. Figure S6. The Effect of ATPsyn-d Knockdown and RU486 Feeding alone on Oxidative Damage, ATP Level, pERK/ERK and pAKT/AKT in Females, Related to Figure 4 and 5.
8. Figure S7. The Genetic Interaction of ATPsyn-d with Tsc2 and JNK in Modulating Lifespan and the Impact of ATPsyn-d Knockdown and RU486 Feeding Alone on Proteostasis, Related to Figure 5 and 6.
9. Table S1. Lifespan of ATPsyn-d Knockdown Flies Fed Sugar-Yeast Diets, Related to Figure 1 and 2.
10. Table S2. The Effect of RU486 Feeding Alone on Lifespan of Flies, Related to Figure 1 and 2.
11. Table S3. Lifespan of actin-GSG/UAS-ATPsyn-d Overexpression Flies Fed Sugar-Yeast Diets, Related to Figure 1 and 2.
12. Table S4. Lifetime Egg Laying of Flies Fed the Sugar-Yeast Diets, Related to Figure 1 and 2.
13. Table S5. The List of Genes that are Significantly Changed by ATPsyn-d Knockdown in Flies Fed SY1:9, Related to Figure 3.
14. Table S6. The List of GO Categories Significantly Changed by ATPsyn-d Knockdown in Flies Fed SY1:9, Related to Figure 3.
15. Table S7. The Interaction between ATPsyn-d and TOR Signaling on Lifespan of Females, Related to Figure 5 and 6.

Supplemental Information

**A Mitochondrial ATP synthase Subunit Interacts  
with TOR Signaling to Modulate Protein Homeostasis  
and Lifespan in Drosophila**

Xiaoping Sun<sup>1</sup>, Charles T. Wheeler<sup>1</sup>, Jason Yolitz<sup>1</sup>, Mara Laslo<sup>1</sup>, Thomas Alberico<sup>1</sup>,  
Yaning Sun<sup>1</sup>, Qisheng Song<sup>2</sup> and Sige Zou<sup>1,\*</sup>

<sup>1</sup>Translational Gerontology Branch, National Institute on Aging, Baltimore, MD 21224,  
USA; <sup>2</sup>Division of Plant Sciences, University of Missouri, Columbia, MO 65211, USA

\*Corresponding author: Sige Zou, Ph.D., Translational Gerontology Branch, National  
Institute on Aging, Baltimore, MD 21224, USA; Phone: 410-558-8461; Fax: 410-558-  
8302; Email: [zous@mail.nih.gov](mailto:zous@mail.nih.gov)

## Supplemental Materials and Methods

### *Fly media and stocks*

Fly stocks were maintained on standard cornmeal medium at  $25\pm 1$  °C,  $60\pm 5\%$  humidity and a 12:12h light/dark cycle (Ashburner et al., 2005). *Canton S*,  $w^{1118}$ , and da-Gal4 ( $w^{1118}$ ; P{w[+mW.hs]=GAL4-da.G32},3) were obtained from Bloomington *Drosophila* Stock Center (Bloomington, Indiana). UAS-ATPsyn-d-RNAi lines,  $w^{1118}$ ; P{GD9915}v21018 and  $w^{1118}$ ; P{KK107800}v104353, were from Vienna *Drosophila* RNAi center (Vienna, Austria), which are labeled as UAS-ATPsyn-d-RNAi(v21018) and UAS-ATPsyn-d-RNAi(v104353) in the main text, respectively. UAS-ATPsyn-d transgenic lines were generated by injecting  $w^{1118}$  with a full-length ATPsyn-d cDNA cloned into the pUAST vector. actin-GSG, da-GSG and UAS-Tsc2 were kindly provided by J. Tower, V. Monnier and D. Pan, respectively. The SY1:9 diet contained 2% sugar and 18% autolyzed yeast (Cat. #103304, MP Biomedicals); SY1:1 had 10% sugar and 10% yeast; SY9:1 had 18% sugar and 2% yeast. All sugar-yeast (SY) diets contained 1.5% agar. The cornmeal food contained 5% glucose, 2.5% sucrose, 6% cornmeal, 1.5% dry yeast and 0.6% agar. The ratio of the total amount of glucose, sucrose and cornmeal to yeast is 9:1. Therefore, the C:P ratio was at the similar level between the cornmeal and SY9:1 diet. For RU486 and rapamycin diets, final concentrations of RU486 and rapamycin were 200  $\mu$ M, while control diets contained equal amounts of ethanol. RU486 was added to the surface of the food as previously described (Poirier et al., 2008). RU486 or rapamycin feeding was initiated in 3-d old flies.

### *Lifespan, lifetime reproduction and food intake assays*

da-Gal4, cad-Gal4, UAS-ATPsyn-d-RNAi, UAS-ATPsyn-d and UAS-Tsc2 lines were backcrossed with  $w^{1118}$  for >5 generations before being used in lifespan assays. To obtain ATPsyn-d knockdown or overexpression flies by RU486 treatment, UAS-ATPsyn-d-RNAi or UAS-ATPsyn-d flies were mated with actin-GSG or da-GSG driver flies on the cornmeal food. Half of the progeny was cultured on RU486-containing diets to induce ATPsyn-d knockdown or overexpression. The other half was cultured on SY-matched control diets without RU486. The GSG driver only and/or UAS transgene only flies were collected as controls for evaluating the effect of RU486 feeding alone. Flies eclosed within 24 h were collected and allowed to mate for 24 h in bottles with SY1:1. Males and females were sorted out, placed in vials and fed SY1:1 for another 24 h. Flies were then transferred to a cornmeal or SY diet supplemented with or without 200  $\mu$ M RU486 and/or 200  $\mu$ M rapamycin and subsequently to fresh diets once every 2–3 days. For the lifespan assay, each vial contained approximately 20 males or females. The number of dead flies was recorded at the time of transfer until all the flies were dead. Lifespan of 100-200 flies in 6-10 vials was measured for each strain and was repeated at least twice. Maximum lifespan was calculated as mean lifespan of the 10% longest survived flies.

For lifetime reproduction assay, each vial contained 5 once-mated females. The number of eggs laid in each vial was counted at each time when flies were transferred to fresh food. Lifetime reproduction was calculated by dividing the lifetime egg production in each vial by the total number of females at the initiation of the experiment. The reproduction assay was repeated six times in six separate vials.

Daily food intake was measured using capillary feeder method (CAFE) previously described by Ja *et al.* with minor modifications (Ja *et al.*, 2007). Briefly, sixteen 14-d old flies were housed in eight capillary feeding chambers with two flies per chamber, which therefore resulted in eight replicates per dietary condition. Each feeding capillary was filled with a specified liquid SY diet without agar. Two capillaries for each dietary condition were separately inserted into two feeding chambers without flies in order to account for evaporation. Food intake was measured once every 24 h for three consecutive days. The average daily food intake for each dietary condition was calculated based on eight independent replicate measurements of food intake in three days.

#### *Quantitative real-time PCR (qPCR)*

Total RNA was isolated from tissues of 14-d old flies using Trizol reagent (Cat #15596-018, Invitrogen, Grand Island, NY) following the manufacture's instruction. cDNA was synthesized with reverse transcriptase SuperScript II (Cat. # 18064-014, Invitrogen) and qPCR was performed with the Step-One plus system (Applied Biosystems, Grand Island, NY) using SYBR green Rox (Cat. # 330523, Qiagen, Valencia, CA) according to the manufacturers' suggested protocols. The transcript level of each target gene was normalized with rp49. Each assay was repeated with at least three biological replicates. The sequences of a pair of primers for each gene tested in this study are as follows (5' to 3'): *ATPsyn-d*, tcaacaagcccaccttctg and tgctccttgactgtagcc; *CG19794*, agcctgaaccactggcata and agatcgaatccttgcttgg; *CG8175*, tcttgagcgattttctgg and tctgccagcactgatgtagc; *CG16844*, cctatcactcgccttcgttt and gatgacattgccaggattca;

CG9119, cccattgtcagagttgcaga and attcacattggcgaagttgg; CG18673, gcagcactacggactcaacaag and cggttatcgtggcattgga; CG5387, tggttgaagactcgaaggaaa and cacttagcttgtcacaatgacg; CG3533, tcattggatgacaaactaacgtg and tttgtgcccaaaagaggtg; CG11821, catggcgggagtgatacta and gcctgttctccgattc; CG9511, cagtcacccggctcaac and ggtgcggtagaagtgaag; CG6027, gcgcagatagtgaatcaacg and gagcaagtggctctgctgtt; CG4501, agcactacatggtgagtcgaag and gtaaggacgcgatcgaagc; *Ucp5*, catgaccgatgcctttgtaa and ccataggtcgcttctcaaa.

### *Western blot analysis*

Proteins were extracted from 14-d old flies using tissue extraction reagent 1 (Cat. # FNN0071, Invitrogen) with protease inhibitor cocktail set III (Cat. # 539134, Calbiochem, Billerica, MA) for all assays except for polyubiquitinated protein detection. Protein concentration was measured using the BCA<sup>TM</sup> protein Assay kit (Cat. # 23225, Thermo Fisher, Waltham, MA) according to the manufacture's instruction. Protein was separated by electrophoresis with the NuPAGE gel and was transferred to the PVDF membrane with the iBot Dry blotting system (Invitrogen). For measuring polyubiquitinated protein, detergent-insoluble pellet was re-suspended in 3x NuPAGE LDS sample buffer (Cat. # NP 0007, Invitrogen) and subjected to SDS-PAGE electrophoresis as previously described (Rana et al., 2013). In Western blot analyses, proteins of interest were probed with specific primary antibodies against ATPsyn-d (custom made with a part of ATPsyn-d coding sequence amplified from a cDNA clone (RH59211) using primers (forward-GGAATTCCAGAGCGAAATCGATGCCTAC and reverse-CGGGATCCGAACAGACGACCAACGAAGC).), phosphorylated S6K (Cat # sc-11759,

Santa cruz biotechnology, Santa Cruz, CA), S6K (provided by T. P. Neufeld), phosphorylated ERK (Cat. #9101, Cell signaling, Danvers, MA), ERK (Cat. # 4695, Cell signaling), 4-HNE-protein adducts (Cat. # 393206, CalBiochem), porin (Cat # MSA03, Mitoscience, Eugene, OR), AKT (Cat. # 9272 and # 4691, Cell signaling), ubiquitin (Cat. # 3936s, Cell Signaling), NDUFS3 (Cat. # ab14711, Abcam) and  $\beta$ Actin (Cat. #8224, Abcam) at an appropriate dilution from 1000-5000. Secondary antibodies were Horseradish peroxidase (HRP) conjugated, including HRP goat anti-rabbit IgG (Cat. # ab6721, Abcam), HRP goat anti-mouse IgG (Cat. # ab6789, Abcam), and HRP donkey anti-goat IgG (Cat. # sc-2020, Santa cruz) at 5000-20,000 of dilution. The signals were detected with Amersham ECL Plus (Cat. # RPN2132, GE healthcare life sciences, Piscataway, NJ). Protein bands were scanned by using the Epson perfection V500 scanner and quantified by using the Image Quant TL software in the Typhoon TRIO+ Variable Mode Imager (GE Healthcare life sciences). For 4-HNE protein adducts and ubiquitinated protein, the whole smear was used for quantification.

### *Microarray studies*

Customized oligonucleotide arrays (Microarrays Inc, Huntsville, AL) representing approximately 13,000 predicted or known *Drosophila* genes were used for gene expression studies. The 3DNA array kit was used for microarray detection (Cat. # W300130 for the Cy3™ kit and W300140 for the Cy5™ kit, Genisphere, Hatfield, PA). Total RNA was extracted from 14-day old female heads of experimental flies fed SY1:9 using Trizol reagent from Invitrogen. Experimental flies were actin-GSG>UAS-ATPsyn-d RNAi(v21018) females treated with or without 200  $\mu$ M RU486. RNA from whole body of



14-day old *Canton S* females fed SY1:1 was used as the common reference sample to normalize the expression of all experimental flies. RNA was quantified with Nanodrop ND-1000 (Nanodrop Technologies, Wilmington, DE) and qualified with Experion automated electrophoresis system (Cat. # 701-7001, Bio-Rad) before performing cDNA synthesis. Equal amount (approximately 3.5  $\mu$ g) of total RNA from experimental and reference samples were used to generate cDNA for each microarray hybridization. cDNA synthesis, hybridization and wash, and signal detection were performed according to the 3DNA Array Detection protocol suggested by the manufacturer (Genisphere). Experimental cDNA was labeled with Cy3 (green signal) and the common reference was labeled with Cy5 (red signal). Hybridized slides were scanned with a GenePix 4100A Scanner (Axon Instruments, Sunnyvale, CA) and images were analyzed with GenePix Pro 6 software. BRB-ArrayTools (<http://linus.nci.nih.gov/BRB-ArrayTools.html>, Biological research Branch, NCI) and DAVID v6.7 software (<http://david.abcc.ncifcrf.gov>) were used to analyze microarray data and determine the significance of individual genes and biological processes, respectively, between ATPsyn-d RNAi and its control flies. Genes with  $p < 0.01$  and false discovery rate (FDR)  $< 0.08$  and biological processes with  $p < 0.05$  were considered having significant changes. Expression patterns of a selected list of genes were confirmed by qPCR with aforementioned sets of primers. Each assay was repeated with 4-6 biological independent samples.

#### *Generation of transgenic flies*

UAS-ATPsyn-d transgenic flies were generated by P element mediated transformation. Genomic DNA isolated from *Canton S* flies was used to amplify the full-length coding sequence of *ATPsyn-d* by polymerase chain reaction (PCR) with forward primer-CTCGAG CCCGCTTTTGTGTTGTCTT and reverse primer-TCTAGAGTGTCAGAGTGCTCCTCGTG. The resulting fragment (602 bps) was confirmed by sequencing and was cloned into the XhoI and XbaI sites of the pUAST vector. The resulting pUAST-ATPsyn-d construct was injected to *w*<sup>1118</sup> flies to make transgenic flies by Rainbow Transgenic Flies Inc. (Camarillo, CA, USA). A transformant with the transgene inserted on chromosome II was mapped and backcrossed to *w*<sup>1118</sup> for more than 5 generations before used in subsequent studies.

#### *Generation of ATPsyn-d antibody*

The ATPsyn-d polyclonal antibody was raised in rabbit against maltose-binding protein (MBP) fusion protein from Josman, LLC (Napa, CA). The pMAL<sup>TM</sup>-c2 vector was used to clone and express MBP-ATPsyn-d fusion protein (New England Biolabs (NEB), Ipswich, MA). To generate the clone with the fusion protein, a part of ATPsyn-d coding sequence was amplified from an ATPsyn-d cDNA clone (RH59211) using PCR primers (forward -GGAATTCCAGAGCGAAATCGATGCCTAC and reverse -CGGGATCCGAACAGACGACCAACGAAGC). The PCR product was inserted into the pMAL<sup>TM</sup>-c2 vector at EcoR1 and BamH1 sites. The inserted sequence was verified by sequencing using maIE primers (Cat. #s1237s, NEB) by GENEWIZ Inc. (South Plainfield, NJ). The MBP-ATPsyn-d fusion protein was induced in *E. coli* DH5α cells by IPTG and verified by SDS-PAGE. Affinity chromatography was applied to purify the

fusion protein for antibody production according to the manufacturer's instruction (Cat. #E8000, NEB) with minor modifications. Briefly, one liter of LB medium containing 2 g of glucose and 0.1 g of ampicillin was inoculated with 50 ml of overnight culture of DH5 $\alpha$  cells containing the MBP-ATPsyn-d fusion plasmid. When the cell density reached approximately  $2 \times 10^6$  cells/ml ( $A_{600} \sim 0.5$ ), 400  $\mu$ l of 1M IPTG was added to the culture to induce the expression of the fusion protein. After 2 h incubation at 37°C, the cells were harvested, frozen, and suspended in 20 ml column buffer (20 mM Tris-HCl, 200 mM NaCl, 1 mM EDTA, and 10 mM  $\beta$ -mercaptoethanol) followed by 4-min sonication on ice (10' tones and 5' pauses). The crude mixture was centrifuged at 17,000 rpm for 30 min. The supernatant was incubated with ~5 ml pre-washed amylose resin (Cat. # E8021L, Bio-Rad) for 1 h at 4°C with shaking to bind MBP fusion protein. The crude mixture was filtered with an Econo disposable column (Cat. # 7321010, Bio-Rad) and washed with 2-3 column volumes of the column buffer. The MBP fusion protein was eluted with 10-20 ml of 30 mM maltose in the column buffer. The eluted fusion protein was concentrated to ~1 mg/ml using Amicon ultra-15 (Cat. # UFC901024, Millipore, Billerica, MA) for antibody production (Josman LLC, Napa, CA). ATPsyn-d polyclonal rabbit antibody was confirmed by Western blot analysis using S2 cell treated with ATPsyn-d double stranded RNA (dsRNA), which knocked down the expression of ATPsyn-d. ATPsyn-d dsRNA was generated by using the MEGASCRIP T7 transcription kit (Cat. # AM1333, Ambion, Grand Island, NY) from a ~ 300bp coding sequence of ATPsyn-d. This fragment was PCR amplified from the ATPsyn-d cDNA clone using gene specific primers containing T7 promoter sequence at 5' end of each primer (forward-TAATACGACTCACTATAGGGAGAATCGATTGGGCCAACTACAA and reverse-

TAATACGACTCACTATAGGGAGACTTGTTGAGGGGATCGAGTG). GFP dsRNA was generated as the control using a GFP specific DNA fragment as the template. The GFP fragment was amplified using a plasmid DNA containing the full length GFP by PCR primers (forward-TAATACGACTCACTATAGGGAGACAAGATACCCAGATCATATGA and reverse-TAATACGACTCACTATAGGGAGAGCCATTCTTTGGTTTGTCTCC). The dsRNA products were purified using the Ambion NucAway spin column (Ambion Cat # AM10070) before added to cell culture.

#### *Mitochondria purification*

Approximately fifty female flies were homogenized in the mitochondrial isolation medium (MIM: 250 mM sucrose, 10 mM Tris pH 7.4, 0.15 mM MgCl<sub>2</sub>) with 10-12 strokes by a glass dounce homogenizer. The homogenate was centrifuged twice at 1,000x g for 5min at 4°C to remove debris. The supernatant was collected and then spun at 13,000 x g for 5 min at 4°C to separate the cytosolic and mitochondrial portion. The pellet was washed with 1 ml MIM and resuspended in 30-50 µl MIM. Fresh mitochondria were immediately used for blue native polyacrylamide gel electrophoresis (BN-PAGE) or other mitochondria activity assays. The purity of cytosolic and mitochondrial fractions was assessed by Western blot analysis using antibodies against AKT and porin, which are cytosol and mitochondria specific proteins, respectively.

#### *Blue native polyacrylamide gel electrophoresis (BN-PAGE)*

BN-PAGE was performed using Novex native PAGE bis-Tris gel system according to the manufacturer's instruction (Invitrogen). All reagents were from Invitrogen. In brief, 60

µg of purified mitochondria was centrifuged at 13,000x g for 5 min at 4°C. The mitochondria pellet was resuspended in 20 µl of 1X Native PAGE Sample buffer (Cat. # BN2003) with 2% digitonin (Cat. # BN2006) and incubated on ice for 15 min. After centrifugation at 20,000x g for 30 min at 4°C, the supernatant was collected and mixed with 1 µl of 5% G250 sample additive (Cat. # BN2004) for electrophoresis on 3-12% Bis-Tris Native PAGE gels (Cat. # BN1001BOX). The native unstained protein marker (Mark™, Cat. # LC0725) was used as the protein standard. After electrophoresis, BN-PAGE gel was stained with the colloidal blue staining kit (Cat. # LC6025) according to manufacturer's suggested protocol.

#### *Measurement of ATP level*

ATP level was determined from whole-body lysates using the ATP Bioluminescence Assay HS II kit (Cat. # 11699709001 Roche Applied Science, Indianapolis, IN). Specifically, the ATP level was measured as the intensity of green fluorescence emitted due to the oxidation of luciferin catalyzed by ATP-dependent luciferase. Approximately 20 frozen females were homogenized in 150 µl ATP cell lysis buffer. The homogenate was sonicated on ice for 4 min (30 sec tones, 30 sec pauses), and then centrifuged at 10,000x g for 5 min to collect the supernatant. The supernatant containing approximately 50 µg total protein was used for each ATP assay. The resulting green fluorescence was measured at absorbance 560 nm in a black plate by using a plate reader (2030 Victor X3, PerkinElmer, Waltham, MA). A standard curve was generated with a series of standard solutions containing ATP at  $10^{-5}$  to  $10^{-11}$  M. The linear regression between the ATP level and bioluminescence values was plotted using the

Prism 3 program (GraphPad Software, La Jolla, CA). ATP levels were calculated based on the standard curve and normalized to total protein content. Each assay was repeated with 5-6 biological replicates.

### *Stress resistance*

Oxidative stress and starvation assays were performed using female adults of 14 days old after fed the SY diets. For the oxidative stress assay, flies were first starved for 3 h in vials with Kimwipe tissue wetted with water only and then transferred to vials containing 3M filter circles (Whatman, Piscataway, NJ) wetted with 350  $\mu$ l of 20 mM paraquat (Cat. # 856117, Sigma, St. Louis, MO) in 5% sucrose solution. Flies were kept in dark and the number of the dead flies was recorded once every 12 hrs. Flies were transferred to new vial with fresh made paraquat sugar solution once every 48 hrs. For the starvation assay, flies were transferred to vials contained only 1.5% agar and the number of dead flies was recorded once every 24 hrs. Each assay was repeated with 6-10 vials each with approximately 20 flies.

### *Aconitase activity assay*

The cytosolic (c-Acon) and mitochondrial Aconitase (m-Acon) activities were measured in female flies using the Aconitase assay kit (Cat. # 705502, Cayman, Ann Arbor, MI) according to the manufacturer's suggested protocol. The Aconitase activity is reflected by the rate of NADPH formation due to conversion of citrate to isocitrate by Aconitase and conversion of isocitrate to  $\alpha$ -ketoglutarate in the presence of isocitric dehydrogenase, which can be measured at the absorbance at 340 nm. Specially,

approximately 20 females were homogenized in 300  $\mu$ l Aconitase homogenization buffer and centrifuged at 800x g for 10 min at 4°C. The supernatant was centrifuged again at 20,000x g for 10 min at 4°C to separate cytosolic and mitochondrial protein. The supernatant was collected as cytosolic portion, while the pellet contained mitochondrial fragment and was resuspended in 60  $\mu$ l cold homogenization buffer. To measure the Aconitase activity, 40  $\mu$ g cytosolic protein or 30  $\mu$ g mitochondria protein was added to one well of a 96 well plate per reaction. The absorbance at 340 nm was measured for 10-15 min at 37°C using a plate reader (PerkinElmer 2030 Victor X3). The Aconitase activity was normalized with total protein content. Each assay was repeated with 5-6 biological replicates.

#### *Citrate synthase (CS) activity assay*

CS activity was measured in female flies using the Citrate synthase assay kit according to the manufacturer's instruction (Cat. # CS0720, Sigma). The CS activity was reflected by the increase in absorbance at 412 nm due to the reduction of DTNB [(5,5'-dithiobis-(2-nitrobenzoic acid)] induced by the reaction between acetyl CoA and oxaloacetate catalyzed by CS. The CS activity was measured in both total protein and mitochondrial fractions. Mitochondrial biogenesis was calculated as the ratio of the CS activity per total protein to the CS activity per mitochondria protein. Specifically, Mitochondria and total protein was isolated from approximately 20 flies using the MITOSO1 kit (Cat. # MITOSO1, Sigma) and CellLytic MT cell lysis buffer (Cat. # C3228, Sigma), respectively, according to the manufacturer's instructions. Isolated mitochondria were resuspended in CellLytic MT cell lysis. 20  $\mu$ g total protein or 4  $\mu$ g mitochondrial protein was added to a

1.5-ml cuvette containing the CS reaction mixture. Absorbance was measured at 412 nm on the kinetic program (20 sec delay, 10 sec interval and 90 sec duration) at room temperature using a UV/VIS spectrometer (PerkinElmer Lambda 25). The CS activity was normalized with total or mitochondrial protein content. Each assay was repeated with 5-6 biological replicates.

#### *Complex III activity (Cytochrome c oxidoreductase) assay*

Complex III activity was measured as the increase of absorbance at 550nm due to the reduction of cytochrome c (ferri-  $\text{Fe}^{3+}$  to ferro-  $\text{Fe}^{2+}$ ) from ubiquinol (coenzyme  $\text{Q}_{10}$ ) electron transfer by Cytochrome c oxidoreductase. The specific complex III activity is sensitive to antimycin A inhibition, and was determined by subtracting the antimycin A insensitive activity from the total Cytochrome c oxidoreductase activity. Fresh isolated mitochondria contain 5  $\mu\text{g}$  protein was added to the reaction medium (200  $\mu\text{M}$  coenzyme  $\text{Q}_{10}$ , 50  $\mu\text{M}$  cytochrome C, 100 mM K phosphate pH 7.5, 250  $\mu\text{M}$  EDTA and 1mM KCN) with or without antimycin inhibitor (5  $\mu\text{l}$  of 2.5 mg/ml) in a 1.5-ml cuvette. Absorbance was measured at 550 nm at 37°C using the kinetic program (5 sec delay, 10 sec interval and 90 sec duration) in the Lambda 25 UV/VIS spectrometer. Enzymatic activities were normalized with mitochondrial protein content. Each assay was repeated with 5-6 biological replicates.

#### *Complex IV (Cytochrome c oxidase) activity assay*

Complex IV activity was performed using the cytochrome c oxidase assay kit (Cat. # CYOCOX1, Sigma) according to the manufacturer's instruction. Complex IV activity was



measured as the decrease rate in absorbance at 550 nm of ferrocytochrome c, which is oxidized to ferricytochrome c by cytochrome c oxidase. Mitochondria were extracted from 20 female flies using the MITOISO1 kit. 5 µg fresh mitochondrial protein was resuspended in 10 µl assay buffer and added to the reaction mixture containing 10 mM Tris-HCl, pH 7.0, 120 mM KCl, 12.5 mM sucrose and 110 nM ferrocytochrome c to the final volume of 1.1 ml in a 1.5-ml cuvette. Absorbance was measured at 550nm at room temperature using the kinetic program (5 sec delay, 10 sec interval and 80 sec duration) in the Lambda 25 UV/VIS spectrometer. Enzymatic activities were normalized with mitochondrial protein content. Each assay was repeated with 5-6 biological replicates.

#### *Hydrogen peroxide (H<sub>2</sub>O<sub>2</sub>) production assay*

H<sub>2</sub>O<sub>2</sub> mainly produced in mitochondria is measured using the Amplex Red Hydrogen peroxide/peroxidase assay kit (Cat. # A22188, Invitrogen) by measuring the red fluorescence signal at excitation ~530 nm and emission ~590 nm, generated from the oxidation of the Amplex Red reagent (10-aceyl-3, 7-dihydroxyphenoxazine) by H<sub>2</sub>O<sub>2</sub> in the presence of horseradish peroxidase (HRP). Mitochondrial solution containing approximately 30 µg protein was suspended in 50 µl assay buffer (50 mM sodium phosphate, pH 7.4), and added to the reaction mixture containing 100 µM Amplex red reagent and 0.2 unit/ml HRP to the final volume of 100 µl per microplate well. H<sub>2</sub>O<sub>2</sub> standard curve was generated with a series of assay buffers containing H<sub>2</sub>O<sub>2</sub> at 0 to 10 µM. The reaction was incubated at room temperature in dark for 30 min, and the fluorescence was measured at excitation 525 nm and emission 580-640 nm using the Glomax Multi Detection System (Promega, Madison, WI). H<sub>2</sub>O<sub>2</sub> production was

normalized to mitochondrial protein content. Each assay was repeated with 5-6 biological replicates.

#### *Mitochondrial membrane potential ( $\Delta\Psi_m$ ) assay*

The mitochondrial membrane potential  $\Delta\Psi_m$  (i.e. electrical gradient) is a major driving force for ATP production. Loss of mitochondria  $\Delta\Psi_m$  results in the depletion of ATP production. The  $\Delta\Psi_m$  was measured by using the cationic carbocyanine lipophilic dye JC-1 (5,5',6,6'-tetrachloro-1,1',3,3'-tetraethylbenzimidazolyl carbocyanine iodide), which fluoresces in red at 590 nm when formed into aggregates in mitochondria. More polarized mitochondria accumulate more dye and produce higher relative fluorescence units (RFU) of red signal. On the other hand, depolarized mitochondria accumulate less dye and exhibit a lower red RFU reading. Therefore, mitochondrial  $\Delta\Psi_m$  and ATP production can be assessed by the changes in the red RFU. Specifically, to measure mitochondrial  $\Delta\Psi_m$ , fresh isolated mitochondria containing 3  $\mu\text{g}$  protein was suspended in 10  $\mu\text{l}$  MITOSO1 storage buffer and added to the JC-1 assay buffer containing 4 mM MOPs, pH 7.5, 22 mM KCl, 2 mM ATP, 2 mM  $\text{MgCl}_2$ , 2 mM sodium succinate, and 0.2 mM EGTA to the final volume of 200  $\mu\text{l}$  per well in a 96-well plate. The reaction was initiated by adding 10  $\mu\text{l}$  JC-1 (4  $\mu\text{g}/\text{ml}$ ) in the MITOSO1 kit and incubated for 7 min at room temperature in the dark to allow the uptake of the dye into the mitochondria. Absorbance was measured using the kinetic program (5 sec delay, 1 min interval and 30 min duration) at excitation/emission 490nm/590nm in a plate reader (PerkinElmer 2030 Victor X3). The mitochondrial  $\Delta\Psi_m$  values were normalized with mitochondrial protein content. Each assay was repeated with 5-6 biological replicates.

### *Measurement of whole body glucose and trehalose levels*

Glucose and trehalose levels were measured in 2-week old females fed SY1:1 and SY1:9 with and without RU486 treatment following the protocols as previously described (Broughton et al., 2008). Briefly, fly bodies without heads were grinded in the lysis buffer containing 1xPBS and 0.05% Triton X-100. Supernatant were collected after centrifugation at 4 °C for 10 min at 10,000 rpm. The glucose concentration was measured shortly after sample preparation using the Infinity Glucose kit according to the manufacturer's instruction (Cat. # TR 15221, Thermo Fisher, Waltham, MA). Total protein concentration in each sample was measured using the BCA<sup>TM</sup> protein Assay kit as described above. The glucose level was calculated based on the glucose standards and normalized to total protein level in each sample. Then 20 ul of supernatant from each sample was digested with trehalase at 37 °C for overnight. The glucose concentrations in the digested samples were measured with the Infinity Glucose kit as described above. The trehalose level was calculated by subtracting the original glucose present in the sample from the amount of glucose after trehalase digestion, and normalized to total protein level in each sample. Seven biologically replicate samples were measured for glucose and trehalose levels in ATPsyn-d RNAi and control female flies.

### *Measurement of polyubiquitinated protein aggregates*

Indirect flight muscle was dissected in ice-cold PBS and subsequently fixed in 3.7% paraformaldehyde PBS solution containing 0.2% Triton X-100 for 20 min at room temperature. Samples were then washed briefly with 1xPBS and were immunostained

with anti-ubiquitin antibody (Cat. # BML-PW8810, Enzo) at 1: 200 dilution, followed by probed with secondary anti-mouse (Alexa-568) (Cat. # A11004, Invitrogen) at 1:400 dilution and phalloidin (FITC) (Cat. # ALX-350-268-MC01, Enzo) at 1: 200 dilution for F-actin as previously described (Rana et al., 2013). Fluorescent images were visualized and recorded with Zeiss LSM 710 confocal microscopy. Total number of protein aggregates was quantified from a selected area of 150x150  $\mu\text{m}^2$  using “Find Maxima” function in Image J.

## References

- Ashburner, M., Golic, K.G., and Hawley, R.S., eds. (2005). *Drosophila: A Laboratory Handbook*, 2nd edn (Woodbury, NY: Cold Spring Harbor Laboratory Press).
- Broughton, S., Alic, N., Slack, C., Bass, T., Ikeya, T., Vinti, G., Tommasi, A.M., Driege, Y., Hafen, E., and Partridge, L. (2008). Reduction of DILP2 in *Drosophila* triages a metabolic phenotype from lifespan revealing redundancy and compensation among DILPs. *PLoS One* 3, e3721.
- Ja, W.W., Carvalho, G.B., Mak, E.M., de la Rosa, N.N., Fang, A.Y., Liang, J.C., Brummel, T., and Benzer, S. (2007). Prandiology of *Drosophila* and the CAFE assay. *Proc Natl Acad Sci U S A* 104, 8253-8256.
- Poirier, L., Shane, A., Zheng, J., and Seroude, L. (2008). Characterization of the *Drosophila* gene-switch system in aging studies: a cautionary tale. *Aging Cell* 7, 758-770.
- Rana, A., Rera, M., and Walker, D.W. (2013). Parkin overexpression during aging reduces proteotoxicity, alters mitochondrial dynamics, and extends lifespan. *Proc Natl Acad Sci U S A* 110, 8638-8643.

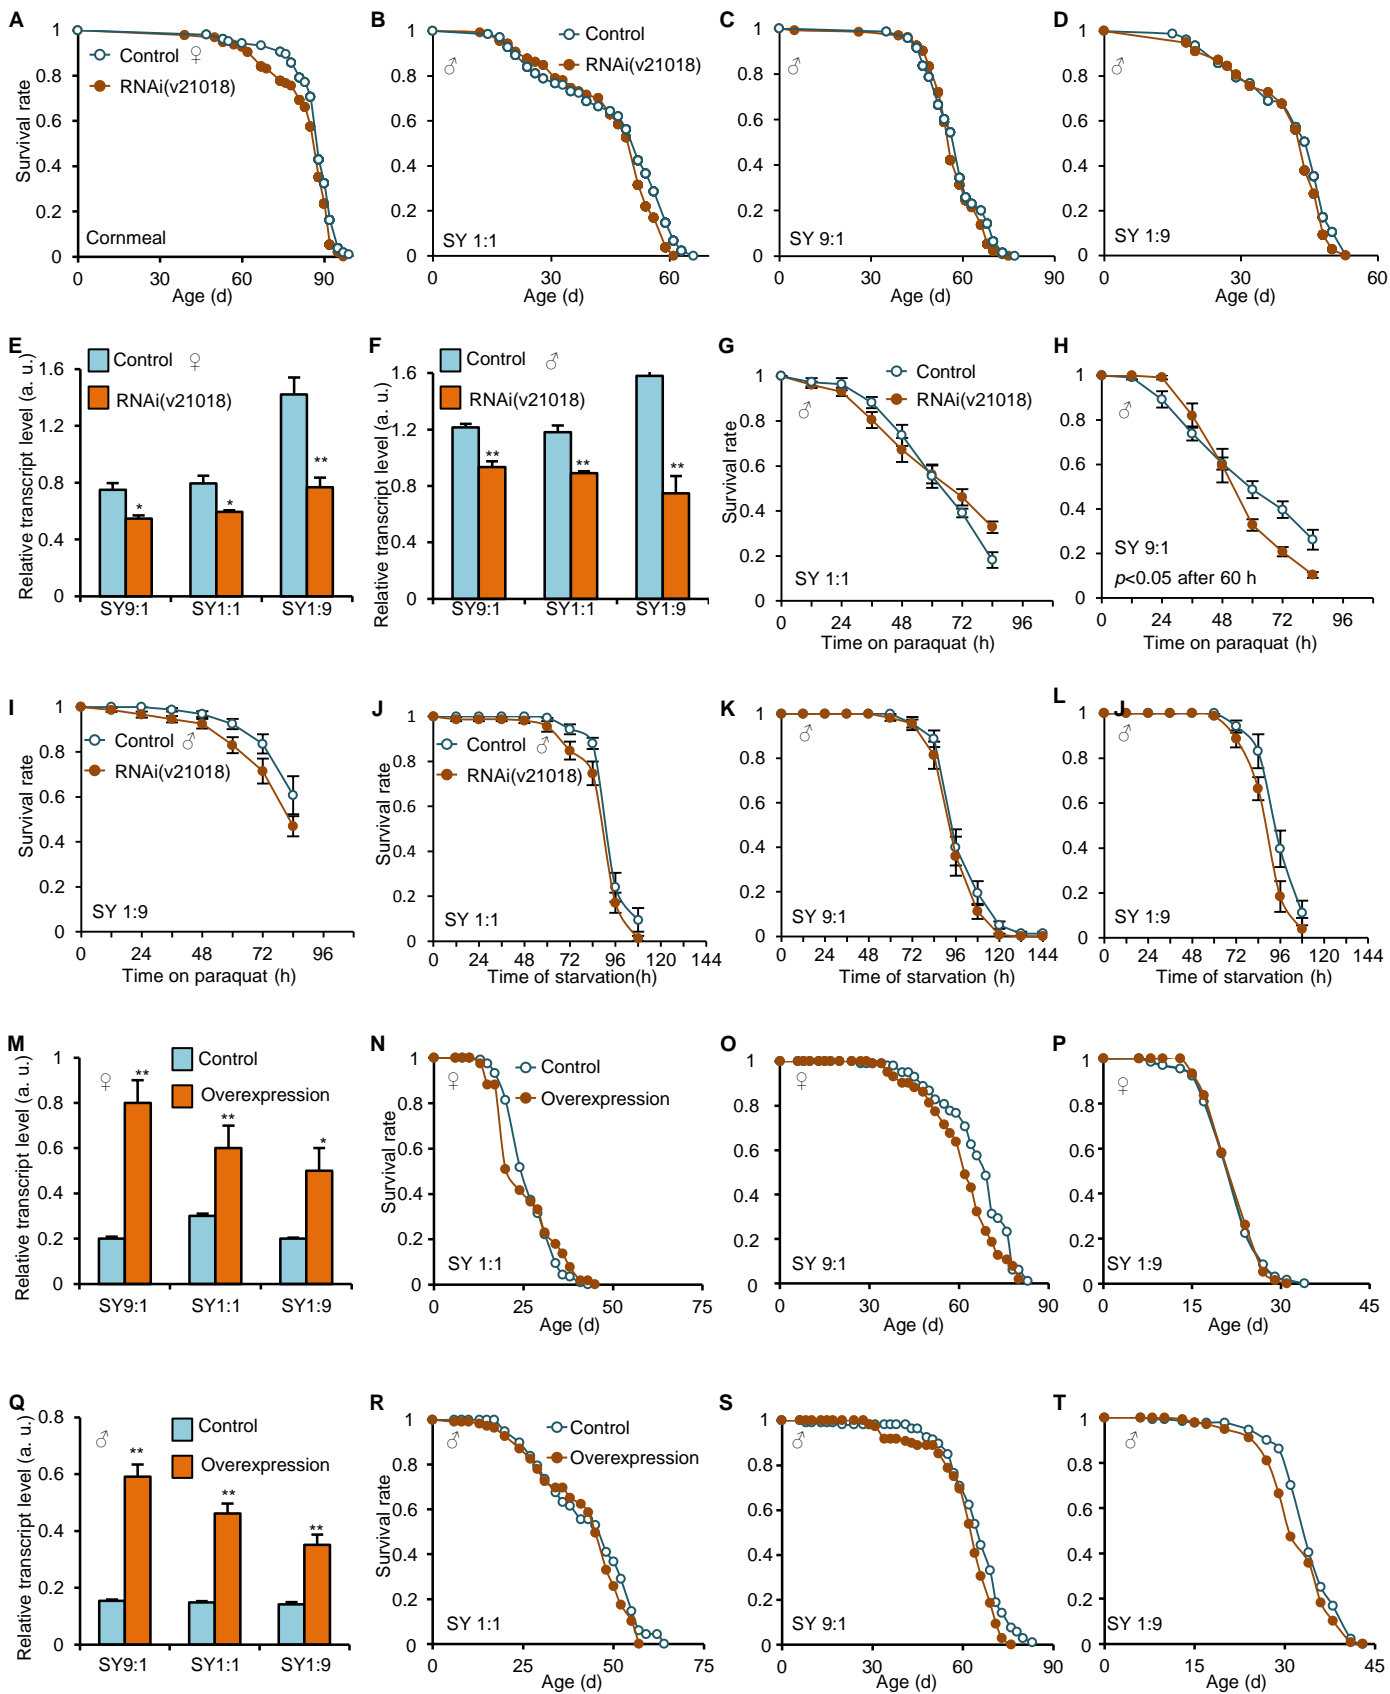

Figure S1

**Figure S1. The Effect of ATPsyn-d Knockdown and Overexpression on Lifespan and Stress Response, Related to Figure 1 and 2.** (A) Lifespan of actin-GSG>UAS-ATPsyn-d-RNAi(v21018) females on cornmeal. ATPsyn-d knockdown does not significantly affect lifespan of females. (B to D) Lifespan of actin-GSG/UAS-ATPsyn-d-RNAi(v21018) males fed SY 1:1, SY 9:1 or SY 1:9 diet with and without 200  $\mu$ M RU486. ATPsyn-d knockdown does not significantly affect lifespan of males. (E and F) RU 486 decreases the mRNA level of ATPsyn-d in actin-GSG>UAS-ATPsyn-d-RNAi(v21018) females and males, respectively, fed SY 9:1, SY 1:1 and SY 1:9 diets, when compared to gender- and diet-matched un-induced controls. The transcript level was normalized to rp49. (G to I) The survival of 14-day old actin-GSG/UAS-ATPsyn-d-RNAi(v21018) males on 20 mM paraquat after being fed SY 1:1, SY 9:1 or SY 1:9 diet with and without 200  $\mu$ M RU486. (J to L) The survival of 14-day old actin-GSG/UAS-ATPsyn-d-RNAi(v21018) males under starvation after being fed SY 1:1, SY 9:1 or SY 1:9 diet with and without 200  $\mu$ M RU486. (M) Transcript levels of ATPsyn-d in actin-GSG/UAS-ATPsyn-d females fed SY 1:1, SY 9:1 or SY 1:9 diet with and without 200  $\mu$ M RU486. RU486 significantly increases the mRNA level of ATPsyn-d in actin-GSG/UAS-ATPsyn-d females. (N to P) Lifespan of actin-GSG/UAS-ATPsyn-d females fed SY 1:1, SY 9:1 or SY 1:9 diets with and without 200  $\mu$ M RU486. ATPsyn-d overexpression does not significantly affect lifespan of females under any of the three SY dietary conditions. (Q) Transcript levels of ATPsyn-d in actin-GSG/UAS-ATPsyn-d(v21018) male flies fed SY 1:1, SY 9:1 or SY 1:9 diet with and without 200  $\mu$ M RU486. RU486 significantly increases the mRNA level of ATPsyn-d in actin-GSG/UAS-ATPsyn-d males. (R to T) Lifespan of actin-GSG/UAS-ATPsyn-d males fed SY 1:1, SY 9:1 or SY 1:9 diet with and without 200  $\mu$ M RU486. ATPsyn-d overexpression does not significantly affect lifespan of males under any of the three SY dietary conditions. ATPsyn-d knockdown flies with line v21018 are labeled as "RNAi". Overexpression of ATPsyn-d is labeled as "Overexpression". Control flies of the same genotype were treated without RU486, labeled as "Control". a.u., arbitrary unit. The transcript level of ATPsyn-d was measured with three biological independent samples and normalized to rp49. \* $p$ <0.05; \*\* $p$ <0.01 by Student's  $t$ -test.

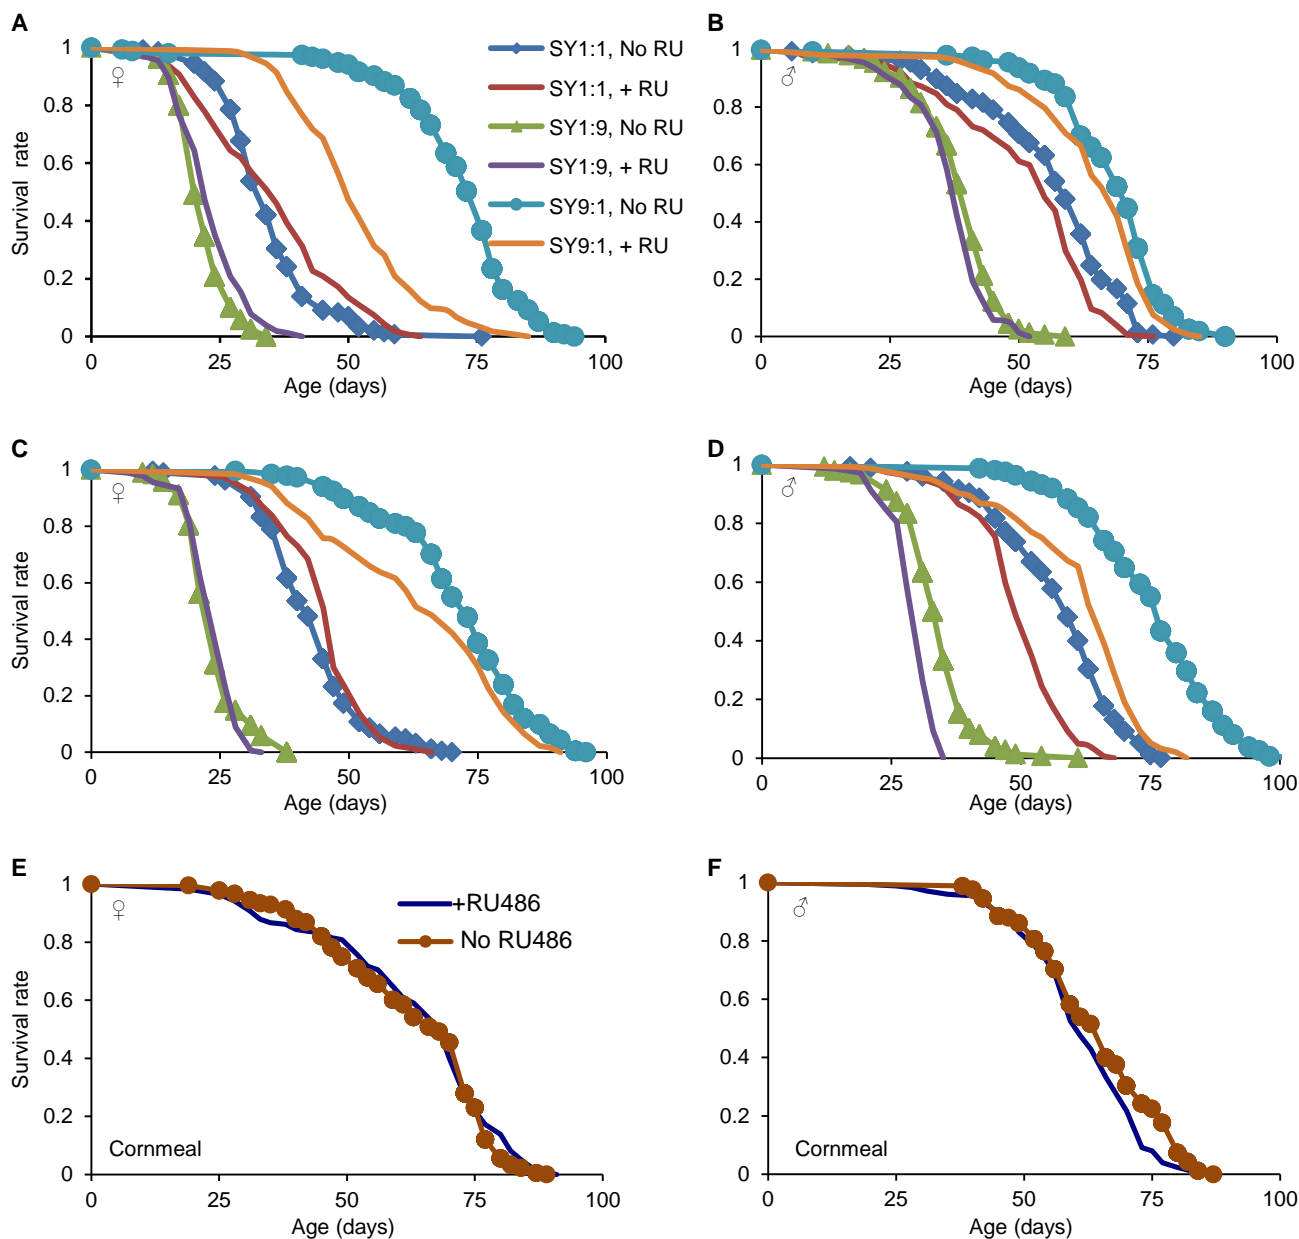

**Figure S2. The Effect of RU486 Alone on the Lifespan of Flies Fed SY1:1, SY1:9, SY9:1 or Cornmeal Diet, Related to Figure 1 and 2.** (A and B) Lifespan of actin-GSG/UAS-GFP-RNAi females and males fed SY1:1, SY1:9 or SY9:1 diet. (C and D) Lifespan of da-GSG/UAS-GFP-RNAi females and males fed SY1:1, SY1:9 or SY9:1 diet. (E and F) Lifespan of *w<sup>1118</sup>*; actin-GSG/+ females and males fed the cornmeal food. Lifespan curves with markers represent flies treated with 200  $\mu$ M RU486 (+RU486 or +RU). Plain lifespan curves represent flies without RU486 treatment (no RU or no RU486). RU486 treatment does not significantly increase lifespan in flies under any dietary condition tested here.

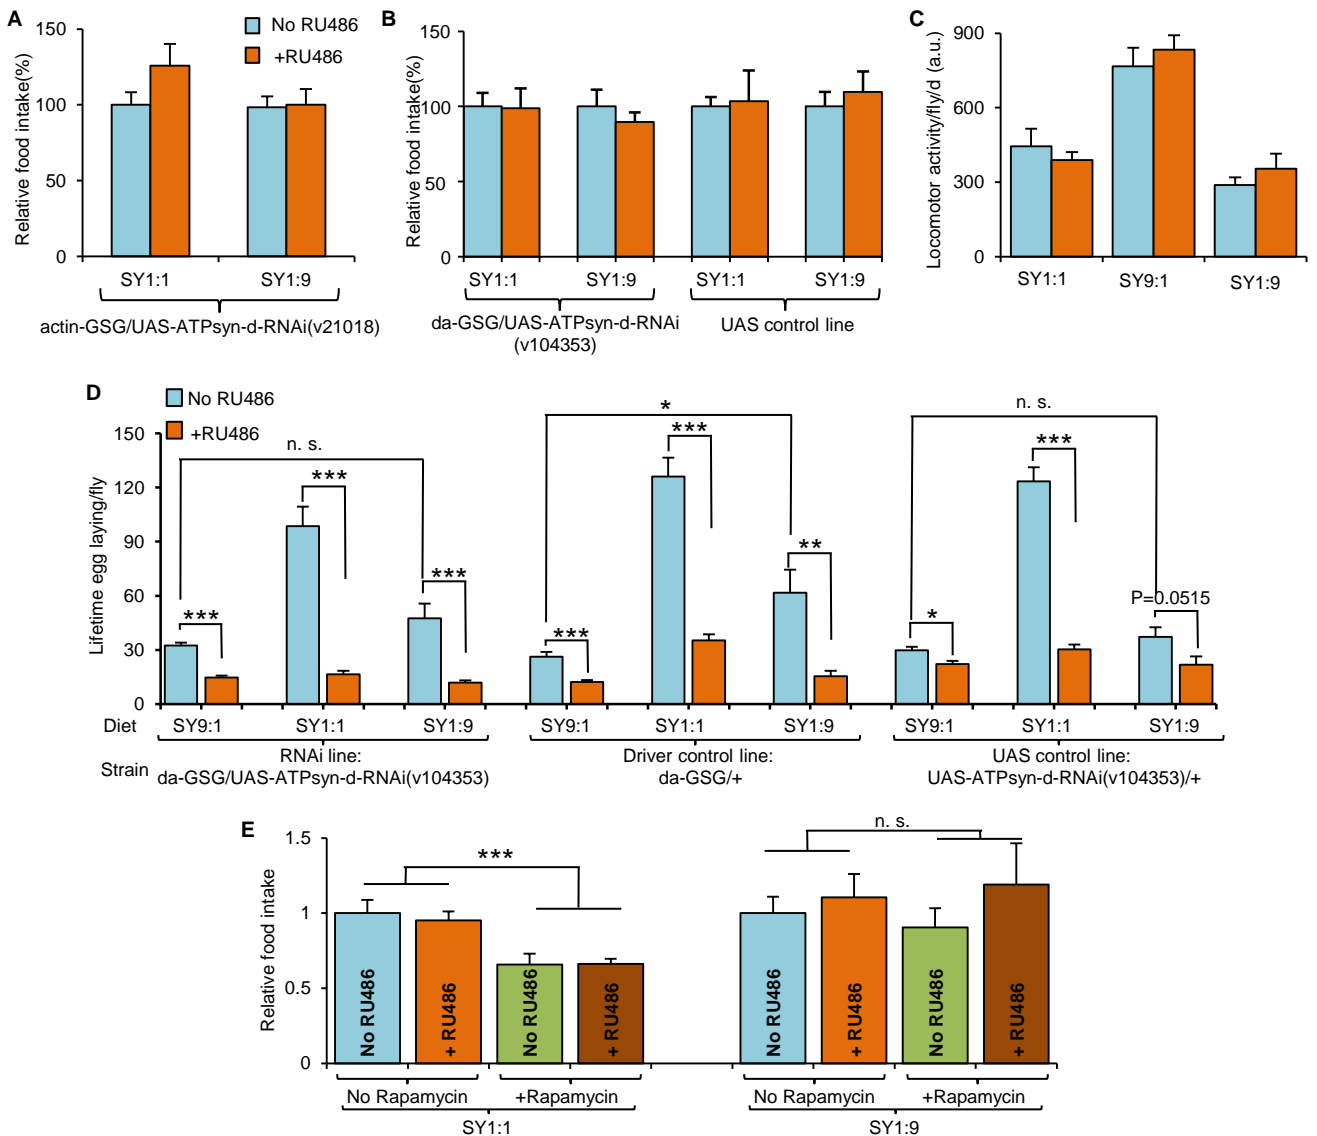

**Figure S3. The Effect of ATPsyn-d Knockdown on Food Intake, Locomotor Activity and Reproduction, Related to Figure 1, 2 and 6.**

(A) Food intake of actin-GSG/UAS-ATPsyn-d-RNAi (line v21018) females fed SY1:1 or SY1:9. ATPsyn-d knockdown (+RU486) does not significantly affect food intake in females when compared to diet-matched controls (No RU486). Food intake in the no RU486 fed flies (no RU486) is set at 100% for comparison. (B) Food intake of da-GSG/UAS-ATPsyn-d-RNAi(v104353) and UAS-ATPsyn-d-RNAi/+ (UAS control line) females fed SY1:1 or SY1:9. ATPsyn-d knockdown (+RU486) does not significantly affect food intake in females when compared to diet-matched controls (No RU486). RU486 feeding alone does not affect food intake (UAS control line). Food intake in No RU486 flies is set at 100%. (C) Locomotor activity of actin-GSG/UAS-ATPsyn-d-RNAi(v21018) females fed SY1:1, SY9:1 or SY1:9. ATPsyn-d knockdown does not affect locomotor activity in females when compared to diet-matched controls. (D) The effect of ATPsyn-d knockdown and RU486 feeding on lifetime reproductive output. Life-time egg production was measured in three fly strains, drive control line da-GSG/+, UAS control line UAS-ATPsyn-d-RNAi(v104353)/+ and knockdown line da-GSG/UAS-ATPsyn-d-RNAi(v104353) with and without RU486 feeding. The number of egg laid and the number of dead flies were counted every time when flies were transferred to fresh food once every 2-3 days. Lifetime egg production was calculated by dividing lifetime egg production in each vial by the initial number of females, which were 5 per vial. Each egg laying assay was repeated six times with six separate vials. (E) The effect of ATPsyn-d knockdown and rapamycin feeding on food intake of da-GSG/UAS-ATPsyn-d-RNAi(v104353) females fed SY1:1 or SY1:9 with and without rapamycin. ATPsyn-d knockdown (+RU486) does not affect food intake in females when compared to diet-matched controls (No RU486). Rapamycin by itself decreases food intake of flies on SY1:1 diet but does not significantly affect food intake of flies on SY1:9 when compared to flies without rapamycin feeding. Food intake of "no RU486 and no rapamycin" fed flies (No RU486-No Rapamycin) on SY1:1 or SY1:9 is set at 1 for comparison among SY diet-matched flies. ATPsyn-d knockdown was induced by 200  $\mu$ M RU486 (+RU486). The concentration of rapamycin in the food was 200  $\mu$ M. d, day; a. u., arbitrary unit. \* $p$ <0.05; \*\* $p$ <0.01; \*\*\* $p$ <0.001; n. s., not statistically significant by Student's  $t$ -test.



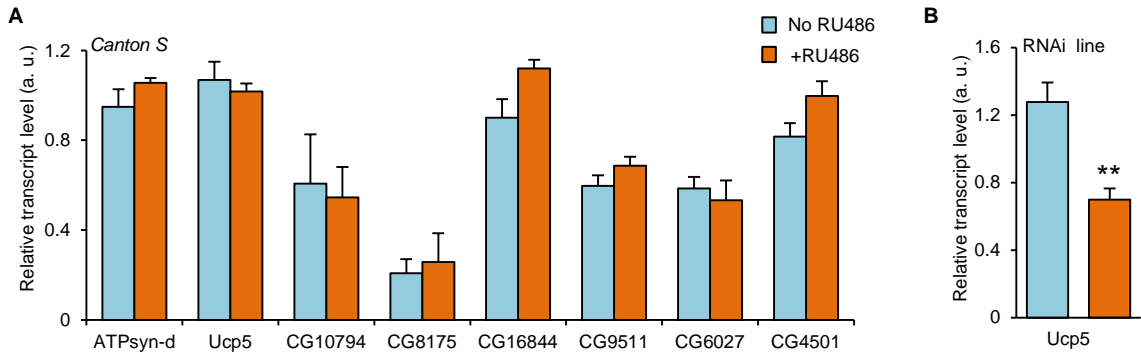

**Figure S4. The Effect of RU486 Feeding on Gene Expression, Related to Figure 3 and 4.** (A) The effect of RU486 feeding alone on transcript levels of ATPsyn-d and Ucp5 and candidate genes from microarray experiments. The transcript levels of these genes were measured by qPCR in the heads of 14-day old wild type *Canton S* females fed SY1:9 supplemented with and without 200  $\mu$ M RU486. (B) The effect of ATPsyn-d knockdown on the transcript level of Ucp5. The transcript level of Ucp5 was measured by qPCR in the heads of 14-d old knockdown line da-GSG/UAS-ATPsyn-d-RNAi(v104353) females fed SY1:9 with and without 200  $\mu$ M RU486. The transcript levels of all the genes were normalized to the transcript level of rp49. Error bars represent standard errors. n=5-6 biologically independent samples for each measurement. \*\* $p < 0.01$  by Student's *t*-test between genotype matched '+RU486' and 'no RU486' groups.

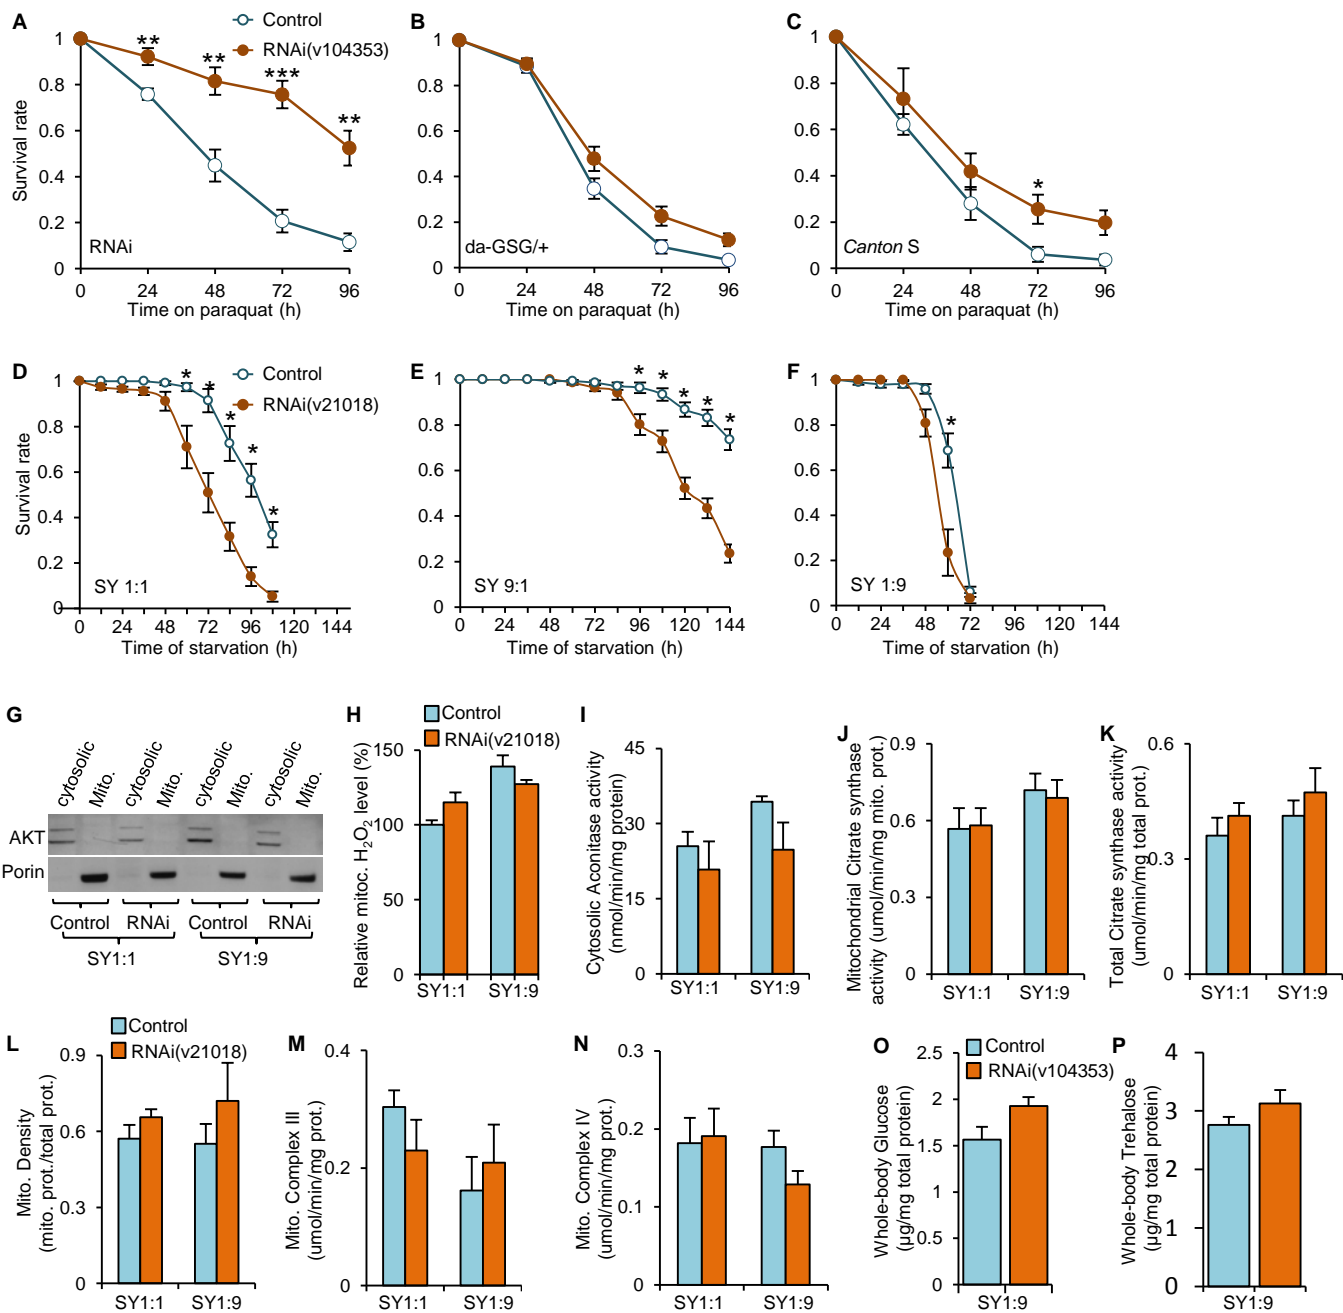

Figure S5

**Figure S5. The Effect of ATPsyn-d Knockdown or RU486 Feeding Alone on Stress Response, Mitochondrial and Metabolism Function in Females, Related to Figure 4.** (A) The survival of da-GSG/UAS-ATPsyn-d-RNAi(v104353) (RNAi) females fed SY1:9 on paraquat treatment. ATPsyn-d knockdown increases flies' resistance to paraquat-induced oxidative stress. (B) The survival of the driver control (da-GSG/+) females fed SY1:9 on paraquat treatment. RU486 feeding alone does not increase flies' resistance to paraquat under SY 1:9. (C) The survival of wild-type *Canton S* females fed SY1:9 on paraquat treatment. RU486 feeding alone does not increase flies' resistance to paraquat under SY 1:9. All flies were fed with 20 mM paraquat starting at the age of 14 days and dead flies were recorded daily for four consecutive days. (D to F) The effect of ATPsyn-d knockdown on starvation resistance in actin-GSG/UAS-ATPsyn-d-RNAi(v21018) females on SY1:1, SY9:1 or SY1:9. ATPsyn-d knockdown (RNAi) decreases resistance to starvation in females, regardless of diet composition, when compared to diet-matched controls (Control). (G) Verification of the purity of cytosolic and mitochondrial protein fractions for physiological and biochemical assays by Western blot. Cytosolic and mitochondrial proteins were isolated from actin-GSG/UAS-ATPsyn-dRNAi(v21018) females fed SY1:1 or SY1:9, and were probed with antibodies against cytosolic protein AKT and mitochondrial protein Porin, respectively. Western blot analyses indicate no or undetectable cross contamination between cytosolic and mitochondrial fractions in the study. (H) Relative amount of mitochondrial H<sub>2</sub>O<sub>2</sub> levels in da-GSG/UAS-ATPsyn-d RNAi(v104353) female flies. The H<sub>2</sub>O<sub>2</sub> value at "Control" on SY1:1 was set at 100% to normalize the rest of H<sub>2</sub>O<sub>2</sub> values. (I) The activity of cytosolic Aconitase in actin-GSG/UAS-ATPsyn-dRNAi(v21018) females fed SY1:1 or SY1:9. Enzymatic activities were normalized to total protein concentration. No significantly difference in Aconitase activity was observed between diet-matched RNAi and control groups. (J) Citrate synthase activity in mitochondrial fraction of actin-GSG/UAS-ATPsyn-d-RNAi (v21018) females treated with or without RU486. (K) Citrate synthase activity in total protein of actin-GSG/UAS-ATPsyn-dRNAi(v21018) females treated with or without RU486. (L) The ratio of mitochondrial protein to total protein was calculated based on values in Fig. S5J and K, which reflects mitochondrial content and hence mitochondrial biogenesis. (M) The activity of mitochondrial Complex III in mitochondrial fraction of actin-GSG/UAS-ATPsyn-d-RNAi (v21018) females treated with or without RU486. (N) The activity of mitochondrial Complex IV in mitochondrial fraction of actin-GSG/UAS-ATPsyn-d-RNAi(v21018) females treated with or without RU486. (O) The whole-body glucose level of da-GSG/UAS-ATPsyn-d-RNAi(v104353) females treated with or without RU486 (n=7 replicates) on SY1:9. No significantly difference in the glucose level was observed between ATPsyn-d knockdown and control groups. (P) The whole-body trehalose level of da-GSG/UAS-ATPsyn-d-RNAi(v104353) females treated with or without RU486 (n=7 replicates) on SY1:9. No significantly difference in the trehalose was observed between ATPsyn-d knockdown and control groups. All enzymatic activities were normalized to total protein concentration. No significant difference in enzymatic activity and mitochondrial content was observed between diet-matched ATPsyn-d knockdown and control groups in the assays shown here. Each assay was repeated at least three times with at least three biologically independent samples and 2-week old flies. Flies were fed with and without 200 μM RU486, labeled as "RNAi" and "Control", respectively. Error bars represent standard errors. \**p*<0.05; \*\**p*<0.01; \*\*\**p*<0.001 between "+RU486" and "no RU486" groups by Student's *t*-test.

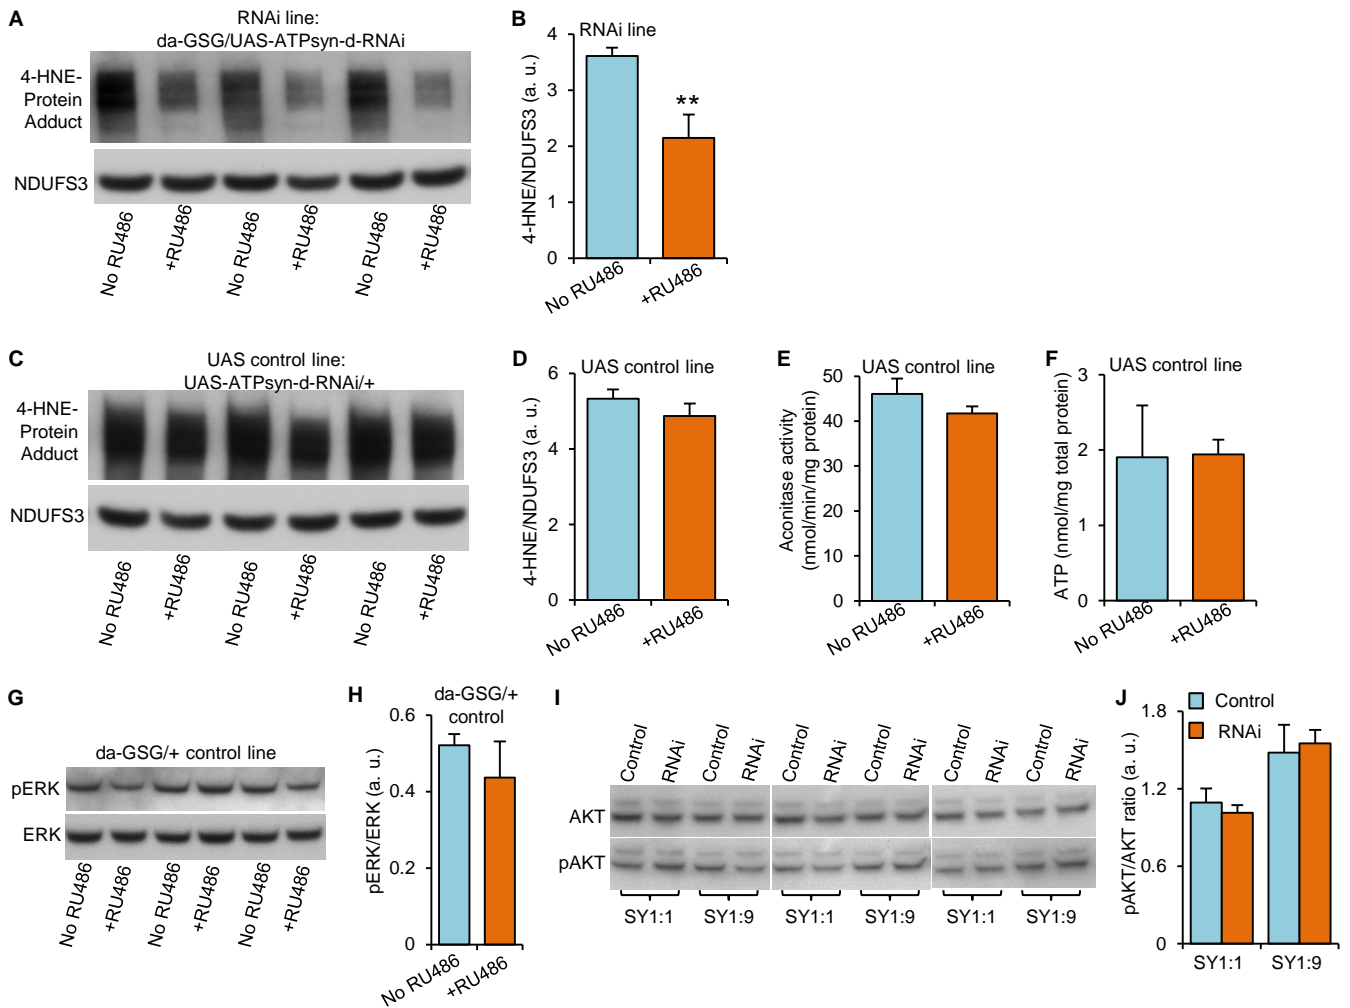

**Figure S6. The Effect of ATPsyn-d Knockdown and RU486 Feeding alone on Oxidative Damage, ATP Level, pERK/ERK and pAKT/AKT in Females, Related to Figure 4 and 5.** (A and B) The effect of ATPsyn-d knockdown induced by RU486 on the level of 4-HNE-protein adducts in the mitochondria of da-GSG/UAS-ATPsyn-d RNAi(v104353) females fed SY1:9. (C and D) The effect of RU486 feeding alone on the level of 4-HNE-protein adducts in the mitochondria of UAS-ATPsyn-d RNAi/+ (UAS control) females fed SY1:9. The level of 4-HNE-protein adducts is normalized to NDUFS3. (E) The effect of RU486 feeding alone on the level of mitochondrial Aconitase activity in UAS-ATPsyn-d RNAi/+ (UAS control) females on SY1:9. (F) The effect of RU486 feeding alone on the ATP level of UAS-ATPsyn-d RNAi/+ (UAS control) flies fed SY1:9. (G and H) The effect of RU486 feeding alone on the ratio of pERK/ERK. The driver control line da-GSG/+ females were fed SY1:9 without RU486 (no RU486 group) or with 200  $\mu$ M RU486 (+RU486 group). The protein levels of pERK and ERK were measured by densitometry to calculate the ratio of phosphorylated ERK to total ERK (pERK/ERK). (I and J) The effect of ATPsyn-d knockdown (RNAi) on the phosphorylation of AKT in da-GSG/UAS-ATPsyn-d RNAi(v104353) females fed SY1:1 or SY1:9. The protein levels of pAKT and AKT were measured by densitometry to calculate the ratio of phosphorylated AKT to total AKT (pAKT/AKT). Each assay was repeated  $\geq 4$  times with  $\geq 4$  biologically independent samples. Three representative samples are shown. "+RU486" represents feeding with 200  $\mu$ M RU486. Error bars represent standard errors. a. u., arbitrary unit; \*\* $p < 0.01$  by Student's *t*-test between genotype matched "+RU486" and "no RU486" groups.

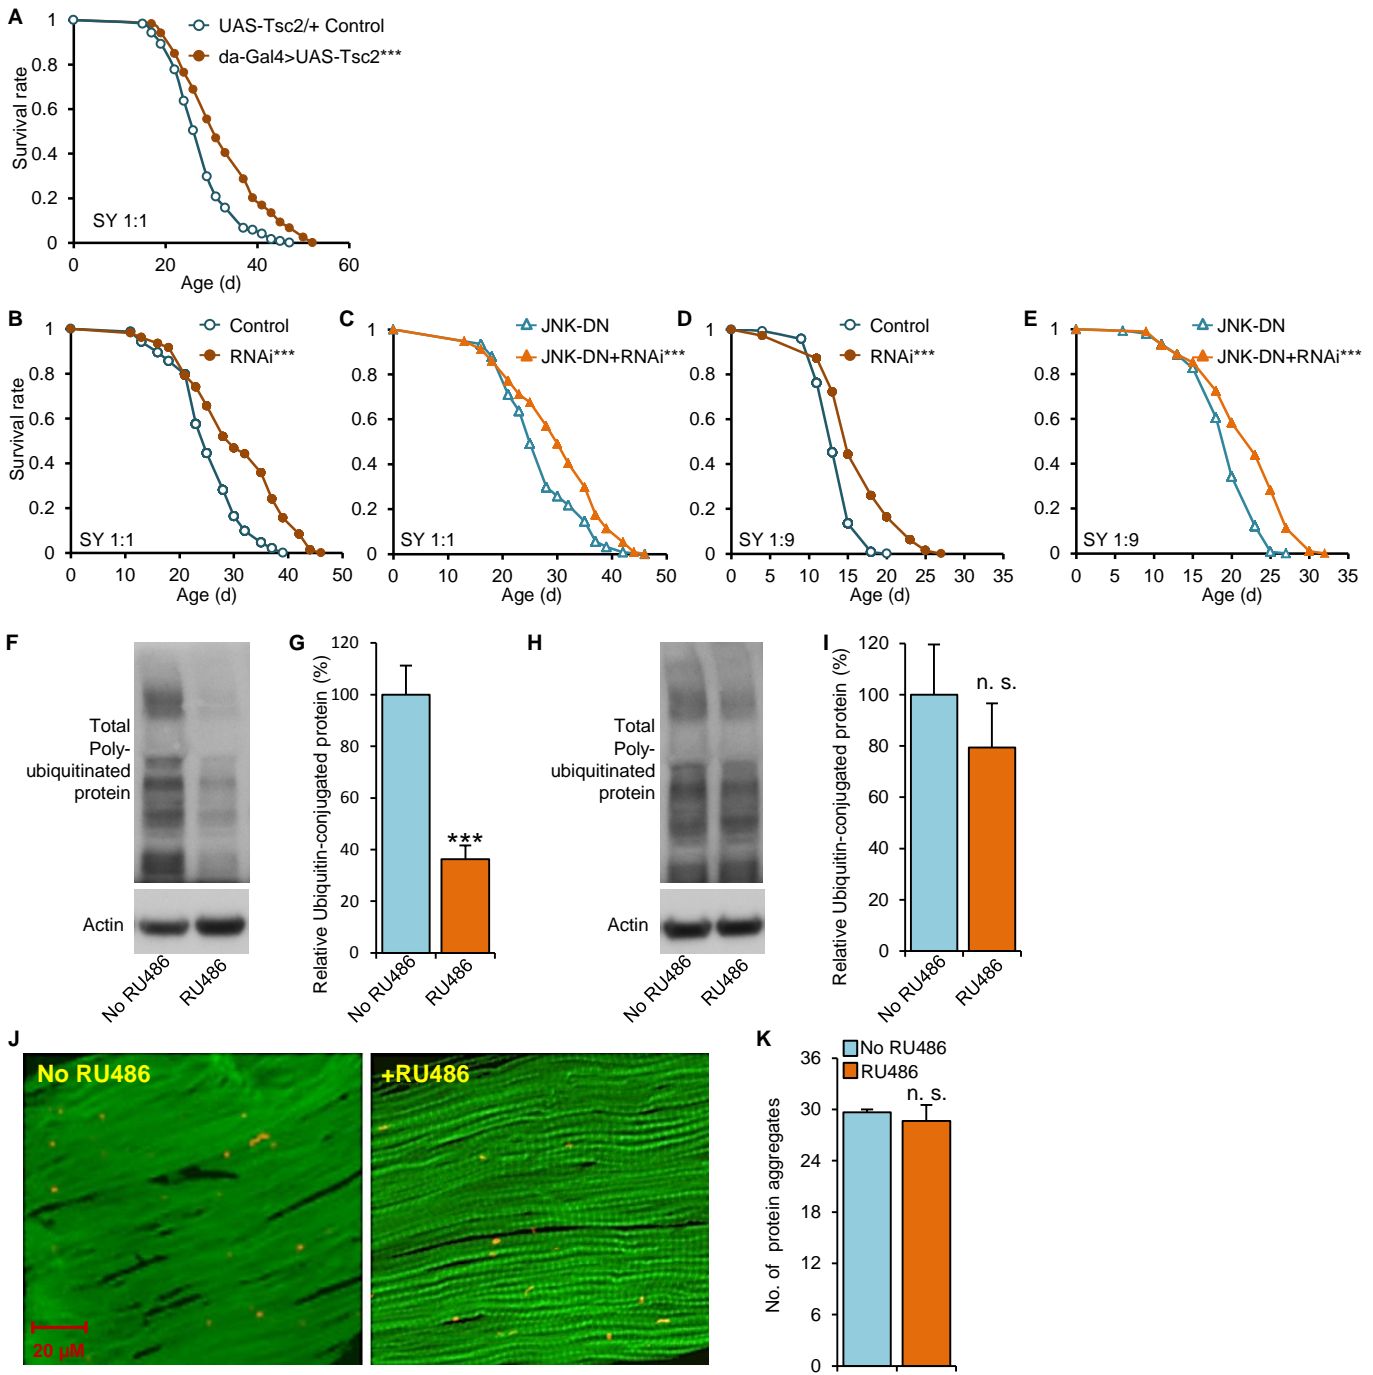

**Figure S7. The Genetic Interaction of ATPsyn-d with Tsc2 and JNK in Modulating Lifespan and the Impact of ATPsyn-d Knockdown and RU486 Feeding Alone on Proteostasis, Related to Figure 5 and 6.** (A) Lifespan of da-Gal4>UAS-Tsc2 and its control Tsc2/+ females fed SY1:1. (B and E) Lifespan of ATPsyn-d knockdown female flies with or without the expression of dominant negative JNK fed SY1:1 or SY1:9. “RNAi” indicates ATPsyn-d knockdown by 200 μM RU486. “Control” represents genotype- and diet-matched controls without RU486 treatment. “JNK-DN” represents expression of dominant negative JNK. Note that Fig. S7B and S7D are the same as Fig. 5H and 5J in the main text, respectively, and are presented for the purpose of comparison to Fig. S7C and S7E. (F and G) The effect of ATPsyn-d knockdown on the level of total polyubiquitinated protein normalized with Actin in da-GSG/UAS-ATPsyn-d RNAi(v104353) females. Relative polyubiquitinated protein level in “No RU486” is set at 100% for comparison. (H and I) The effect of RU486 feeding alone on the level of total polyubiquitinated protein normalized with Actin in +/UAS-ATPsyn-d RNAi(v104353) (UAS control line) females. Relative polyubiquitinated protein level in “No RU486” is set at 100% for comparison. (J and K) The effect of RU486 feeding alone on the accumulation of polyubiquitinated protein aggregates in fly flight muscle. The scale bar is shown in the image of J. “RU486” indicates feeding of 200 μM RU486. “No RU486” represents flies without RU486 treatment. Error bars represent standard errors. \*\*\* $p < 0.001$  by Logrank test in Fig. 7A to 7E; \*\*\* $p < 0.001$  by Student’s *t*-test in Fig. 7G, 7I and 7K; n. s., not statistically significant.

**Table S1. Lifespan of ATPsyn-d Knockdown Flies Fed Sugar-Yeast Diets, Related to Figure 1 and 2**

| Strain                                   | Sex | Replicate | SY diet <sup>a</sup> | Presence of RU486 <sup>b</sup> | # of flies per trial | Mean lifespan±SE (d) <sup>c</sup> | Change of mean lifespan <sup>d</sup> | p value <sup>e</sup> | Maxi lifespan±SE (d) <sup>f</sup> | Change of maxi lifespan <sup>d</sup> |
|------------------------------------------|-----|-----------|----------------------|--------------------------------|----------------------|-----------------------------------|--------------------------------------|----------------------|-----------------------------------|--------------------------------------|
| actin-GSG/UAS-ATPsyn-dRNAi (line v21018) | ♀   | #1        | SY9:1                | No RU486                       | 114                  | 64.5±0.9                          |                                      |                      | 80.4±0.8                          |                                      |
|                                          |     |           |                      | RU486                          | 143                  | 64.7±0.9                          | 0.3%                                 | 0.6973               | 78.1±0.9                          | -2.86%                               |
|                                          |     |           | SY1:1                | No RU486                       | 142                  | 30.4±0.8                          |                                      |                      | 50.2±1.5                          |                                      |
|                                          |     |           |                      | RU486                          | 138                  | 34.3±1.1                          | 12.8%                                | 0.0012               | 57.4±1.3                          | 14.34%                               |
|                                          |     | #2        | SY9:1                | No RU486                       | 134                  | 65.2±0.9                          |                                      |                      | 81.1±0.6                          |                                      |
|                                          |     |           |                      | RU486                          | 136                  | 63.3±1.1                          | -2.9%                                | 0.9416               | 80.9±0.5                          | -0.25%                               |
|                                          |     |           | SY1:1                | No RU486                       | 137                  | 30.9±0.7                          |                                      |                      | 45.9±1.0                          |                                      |
|                                          |     |           |                      | RU486                          | 138                  | 35.6±1.0                          | 15.2%                                | <.0001               | 55.4±1.4                          | 20.70%                               |
|                                          | ♂   | #1        | SY9:1                | No RU486                       | 140                  | 57.6±0.8                          |                                      |                      | 72.5±0.6                          |                                      |
|                                          |     |           |                      | RU486                          | 131                  | 56.7±0.8                          | -1.6%                                | 0.1356               | 70.0±0.7                          | -3.45%                               |
|                                          |     |           | SY1:1                | No RU486                       | 137                  | 46.2±1.3                          |                                      |                      | 62.9±0.5                          |                                      |
|                                          |     |           |                      | RU486                          | 137                  | 45.5±1.1                          | -1.5%                                | 0.0099               | 59.7±0.3                          | -5.09%                               |
|                                          |     | #2        | SY9:1                | No RU486                       | 140                  | 61.9±0.9                          |                                      |                      | 79.5±1.5                          |                                      |
|                                          |     |           |                      | RU486                          | 135                  | 56.6±0.9                          | -8.6%                                | <.0001               | 69.9±1.0                          | -12.08%                              |
|                                          |     |           | SY1:1                | No RU486                       | 132                  | 47.4±1.3                          |                                      |                      | 63.1±0.4                          |                                      |
|                                          |     |           |                      | RU486                          | 136                  | 43.1±1.2                          | -9.1%                                | <.0001               | 58.7±0.3                          | -6.97%                               |
| da-GSG/UAS-ATPsyn-dRNAi (line v104353)   | ♀   | #1        | SY9:1                | No RU486                       | 121                  | 60.6±1.0                          |                                      |                      | 80.5±0.4                          |                                      |
|                                          |     |           |                      | RU486                          | 125                  | 54.5±1.5                          | -10.0%                               | 0.003                | 78.1±0.7                          | -3.0%                                |
|                                          |     |           | SY1:1                | No RU486                       | 121                  | 29.4±0.6                          |                                      |                      | 41.7±0.9                          |                                      |
|                                          |     |           |                      | RU486                          | 119                  | 43.2±1.0                          | 46.9%                                | <.0001               | 58.8±0.4                          | 41.0%                                |
|                                          |     | #2        | SY9:1                | No RU486                       | 117                  | 15.8±0.3                          |                                      |                      | 20.1±0.6                          |                                      |
|                                          |     |           |                      | RU486                          | 123                  | 20.7±0.4                          | 31.0%                                | <.0001               | 26.7±0.5                          | 32.8%                                |

<sup>a</sup>SY, sugar-yeast diet. The ratio of sugar to yeast is listed after "SY".

<sup>b</sup>The presence of RU486 induces ATPsyn-d RNAi.

<sup>c</sup>Lifespan is expressed as mean±Standard error (SE) in days (d).

<sup>d</sup>Percentage changes were referenced to SY diet-matched control flies without RU486 treatment.

<sup>e</sup>P values were based on comparing diet-matched flies with and without RU486 by logrank test.

<sup>f</sup>Maxi refers to maximum lifespan calculated as mean lifespan of the top 10% longest-live flies.

**Table S2. The Effect of RU486 Feeding Alone on Lifespan of Flies, Related to Figure 1 and 2**

| Genotype                        | Sex      | SY or cornmeal diet <sup>a</sup> | Presence of RU486 <sup>b</sup> | # of flies per trial | Mean lifespan±SE (d) <sup>c</sup> | Change of mean lifespan <sup>d</sup> | p value (logrank) <sup>e</sup> |
|---------------------------------|----------|----------------------------------|--------------------------------|----------------------|-----------------------------------|--------------------------------------|--------------------------------|
| actin-GSG; UAS-GFP-RNAi         | ♀        | SY9:1                            | No RU486                       | 153                  | 71.5±1.1                          |                                      |                                |
|                                 |          |                                  | RU486                          | 163                  | 51.8±0.9                          | -27.6%                               | <.0001                         |
|                                 |          | SY1:1                            | No RU486                       | 145                  | 34.4±0.8                          |                                      |                                |
|                                 |          |                                  | RU486                          | 163                  | 35.1±1.0                          | 2.0%                                 | 0.0514                         |
|                                 | ♂        | SY1:9                            | No RU486                       | 159                  | 21.8±0.4                          |                                      |                                |
|                                 |          |                                  | RU486                          | 154                  | 23.3±0.5                          | 6.9%                                 | 0.0017                         |
|                                 |          | SY9:1                            | No RU486                       | 159                  | 68.4±0.9                          |                                      |                                |
|                                 |          |                                  | RU486                          | 158                  | 64.4±1.0                          | -5.8%                                | 0.0018                         |
| SY1:1                           | No RU486 | 157                              | 56.1±1.1                       |                      |                                   |                                      |                                |
|                                 | RU486    | 157                              | 51.3±1.2                       | -8.6%                | <.0001                            |                                      |                                |
| SY1:9                           | No RU486 | 156                              | 38.5±0.6                       |                      |                                   |                                      |                                |
|                                 | RU486    | 156                              | 37.0±0.6                       | -3.9%                | 0.0218                            |                                      |                                |
| da-GSG; UAS-GFP-RNAi            | ♀        | SY9:1                            | No RU486                       | 185                  | 70.9±1.1                          |                                      |                                |
|                                 |          |                                  | RU486                          | 186                  | 62.9±1.3                          | -11.3%                               | <.0001                         |
|                                 |          | SY1:1                            | No RU486                       | 186                  | 42.6±0.7                          |                                      |                                |
|                                 |          |                                  | RU486                          | 175                  | 44.6±0.7                          | 4.7%                                 | 0.0717                         |
|                                 | ♂        | SY1:9                            | No RU486                       | 190                  | 23.7±0.4                          |                                      |                                |
|                                 |          |                                  | RU486                          | 180                  | 23.9±0.4                          | 0.8%                                 | 0.2782                         |
|                                 |          | SY9:1                            | No RU486                       | 163                  | 75.1±1.1                          |                                      |                                |
|                                 |          |                                  | RU486                          | 154                  | 60.9±1.1                          | -18.9%                               | <.0001                         |
| SY1:1                           | No RU486 | 176                              | 56.9±0.9                       |                      |                                   |                                      |                                |
|                                 | RU486    | 164                              | 49.2±0.8                       | -13.5%               | <.0001                            |                                      |                                |
| SY1:9                           | No RU486 | 151                              | 33.8±0.6                       |                      |                                   |                                      |                                |
|                                 | RU486    | 150                              | 29.2±0.4                       | -13.6%               | <.0001                            |                                      |                                |
| w <sup>1118</sup> ; actin-GSG/+ | ♀        | Cornmeal                         | No RU486                       | 183                  | 62.7 ± 1.2                        |                                      |                                |
|                                 |          |                                  | RU486                          | 173                  | 63.2 ± 1.3                        | 0.8%                                 | 0.3239                         |
|                                 | ♂        | Cornmeal                         | No RU486                       | 165                  | 64.1 ± 1.0                        |                                      |                                |
|                                 |          |                                  | RU486                          | 175                  | 61.1 ± 0.9                        | -4.7%                                | 0.0055                         |

<sup>a</sup>SY, sugar-yeast diet. The ratio of sugar to yeast is listed after "SY".

<sup>b</sup>The presence of RU486 refers to 200 μM RU486.

<sup>c</sup>Lifespan is expressed as mean±Standard error (SE) in days (d).

<sup>d</sup>Percentage changes were referenced to SY diet-matched control flies without RU486 treatment.

<sup>e</sup>P values were based on comparing diet-matched flies with and without RU486 by logrank test.

**Table S3. Lifespan of actin-GSG/UAS-ATPsyn-d Overexpression Flies Fed Sugar-Yeast Diets, Related to Figure 1 and 2**

| Sex | Replicate | SY diet <sup>a</sup> | Presence of RU486 <sup>b</sup> | # of flies per trial | Mean lifespan±SE (d) <sup>c</sup> | Change of mean lifespan <sup>d</sup> | p value <sup>e</sup> | Maxi lifespan±SE (d) <sup>f</sup> | Change of maxi lifespan <sup>d</sup> |
|-----|-----------|----------------------|--------------------------------|----------------------|-----------------------------------|--------------------------------------|----------------------|-----------------------------------|--------------------------------------|
| ♀   | #1        | SY9:1                | No RU486                       | 99                   | 66.5±1.2                          |                                      |                      | 81.2±0.9                          |                                      |
|     |           |                      | RU486                          | 102                  | 61.7±1.2                          | -7.2%                                | 0.0019               | 80.2±0.5                          | -1.2%                                |
|     |           | SY1:1                | No RU486                       | 118                  | 27.1±0.6                          |                                      |                      | 37.8±0.8                          |                                      |
|     |           |                      | RU486                          | 118                  | 25.6±0.8                          | -5.5%                                | 0.9732               | 40.9±0.7                          | 8.2%                                 |
| ♀   | #2        | SY9:1                | No RU486                       | 144                  | 64.3±1.1                          |                                      |                      | 81.1±0.4                          |                                      |
|     |           |                      | RU486                          | 137                  | 57.8±1.0                          | -10.1%                               | <.0001               | 76.9±0.9                          | -5.2%                                |
|     |           | SY1:1                | No RU486                       | 138                  | 24.3±0.5                          |                                      |                      | 33.0±0.7                          |                                      |
|     |           |                      | RU486                          | 148                  | 28.3±0.7                          | 16.5%                                | <.0001               | 42.3±0.8                          | 28.2%                                |
| ♂   | #1        | SY9:1                | No RU486                       | 106                  | 64.5±1.1                          |                                      |                      | 79.5±0.9                          |                                      |
|     |           |                      | RU486                          | 108                  | 61.3±1.1                          | -5.0%                                | 0.0033               | 73.6±0.5                          | -7.4%                                |
|     |           | SY1:1                | No RU486                       | 117                  | 43.3±1.2                          |                                      |                      | 60.3±1.0                          |                                      |
|     |           |                      | RU486                          | 109                  | 42.0±1.2                          | -3.0%                                | 0.0927               | 57.0±0                            | -5.5%                                |
| ♂   | #2        | SY9:1                | No RU486                       | 131                  | 34.1±0.5                          |                                      |                      | 41.5±0.2                          |                                      |
|     |           |                      | RU486                          | 137                  | 32.2±0.5                          | -5.9%                                | 0.0081               | 41.1±0.1                          | -1.0%                                |
|     |           | SY1:1                | No RU486                       | 152                  | 60.1±1.0                          |                                      |                      | 77.5±0.8                          |                                      |
|     |           |                      | RU486                          | 146                  | 58.9±0.9                          | -2.0%                                | 0.0677               | 73.5±0.9                          | -5.2%                                |
| ♂   | #2        | SY1:1                | No RU486                       | 139                  | 46.5±1.1                          |                                      |                      | 62.0±0                            |                                      |
|     |           |                      | RU486                          | 142                  | 44.0±1.0                          | -5.4%                                | 0.0005               | 57.0±0.6                          | -8.1%                                |
|     |           | SY1:9                | No RU486                       | 141                  | 32.7±0.4                          |                                      |                      | 39.6±0.9                          |                                      |
|     |           |                      | RU486                          | 130                  | 29.5±0.5                          | -9.8%                                | <.0001               | 36.8±0.3                          | -7.1%                                |

<sup>a</sup>SY, sugar-yeast diet. The ratio of sugar to yeast is listed after "SY".

<sup>b</sup>The presence of RU486 induces ATPsyn-d overexpression.

<sup>c</sup>Lifespan is expressed as mean±Standard error (SE) in days (d).

<sup>d</sup>Percentage changes were referenced to SY diet-matched control flies without RU486 treatment.

<sup>e</sup>P values were based on comparing diet-matched flies with and without RU486 by logrank test.

<sup>f</sup>Maxi refers to maximum lifespan calculated as mean lifespan of the top 10% longest-live flies.



**Table S4. Lifetime Egg Laying of Flies Fed the Sugar-Yeast Diets, Related to Figure 1 and 2**

| Genotype                                     | SY diet <sup>a</sup> | Presence of RU486 <sup>b</sup> | No. of replicates | Mean lifetime egg laying±SE <sup>c</sup> | Percentage of reproduction decrease <sup>d</sup> | p value <sup>e</sup> |
|----------------------------------------------|----------------------|--------------------------------|-------------------|------------------------------------------|--------------------------------------------------|----------------------|
| da-GSG/UAS-ATPsyn-dRNAi (v104353)            | SY9:1                | No RU486                       | 6                 | 32.5±1.5                                 |                                                  |                      |
|                                              |                      | RU486                          | 6                 | 14.7±1.0                                 | -54.8%                                           | <.0001               |
|                                              | SY1:1                | No RU486                       | 6                 | 98.7±10.7                                |                                                  |                      |
|                                              |                      | RU486                          | 6                 | 16.4±2.0                                 | -83.4%                                           | <.0001               |
|                                              | SY1:9                | No RU486                       | 6                 | 47.6±8.0                                 |                                                  |                      |
|                                              |                      | RU486                          | 6                 | 11.8±1.2                                 | -75.2%                                           | <.0001               |
| da-GSG/+ (driver only line)                  | SY9:1                | No RU486                       | 6                 | 26.3±2.6                                 |                                                  |                      |
|                                              |                      | RU486                          | 6                 | 12.2±1.1                                 | -53.6%                                           | 0.0005               |
|                                              | SY1:1                | No RU486                       | 6                 | 126.0±10.6                               |                                                  |                      |
|                                              |                      | RU486                          | 6                 | 35.2±3.4                                 | -72.1%                                           | <.0001               |
|                                              | SY1:9                | No RU486                       | 6                 | 61.6±12.8                                |                                                  |                      |
|                                              |                      | RU486                          | 6                 | 15.4±3.0                                 | -75.0%                                           | 0.0056               |
| UAS-ATPsyn-dRNAi/+ (UAS (v104353) only line) | SY9:1                | No RU486                       | 6                 | 29.8±2.0                                 |                                                  |                      |
|                                              |                      | RU486                          | 6                 | 22.2±1.7                                 | -25.3%                                           | 0.0149               |
|                                              | SY1:1                | No RU486                       | 6                 | 123.4±7.9                                |                                                  |                      |
|                                              |                      | RU486                          | 6                 | 30.3±2.6                                 | -75.4%                                           | <.0001               |
|                                              | SY1:9                | No RU486                       | 6                 | 37.3±5.3                                 |                                                  |                      |
|                                              |                      | RU486                          | 6                 | 21.8±4.6                                 | -41.5%                                           | 0.0515               |

<sup>a</sup>SY, sugar-yeast diet. The ratio of sugar to yeast is listed after "SY".

<sup>b</sup>The presence of RU486 refers to 200 μM RU486.

<sup>c</sup>Lifetime egg laying is expressed as mean±Standard error (SE) per fly.

<sup>d</sup>Percentage changes were referenced to SY diet-matched flies without RU486 treatment.

<sup>e</sup>P values were based on comparing diet-matched flies with and without RU486 by Student's *t*-test.

**Table S5. The List of Genes that are Significantly Changed by ATPsyn-d Knockdown in Flies Fed SY1:9, Related to Figure 3**

| Unique array id | Gene symbol <sup>a</sup> | Gene name <sup>b</sup>                                        | Fold-change | Parametric p-value | FDR <sup>c</sup> |
|-----------------|--------------------------|---------------------------------------------------------------|-------------|--------------------|------------------|
| 03: F-12        | CG5472                   | peptidyl- $\alpha$ -hydroxyglycine- $\alpha$ -amidating lyase | 5.84        | 0.00002            | 0.00326          |
| 14: J-23        | CG40306                  | stoned A                                                      | 5.54        | 0.00012            | 0.00664          |
| 24: J-21        | CG33245                  | CG33245                                                       | 4.86        | 0.00009            | 0.00623          |
| 38: B-22        | CG3257                   | CG3257                                                        | 4.75        | 0.00004            | 0.00418          |
| 21: M-24        | CG1168                   | 7B2                                                           | 4.59        | 0.00058            | 0.01350          |
| 26: G-24        | CG4779                   | homogentisate 1,2-dioxygenase                                 | 4.55        | 0.00011            | 0.00653          |
| 07: J-12        | CG6656                   | CG6656                                                        | 4.54        | 0.00010            | 0.00637          |
| 22: H-24        | CG13928                  | CG13928                                                       | 4.2         | 0.00401            | 0.04180          |
| 32: I-11        | CG31778                  | CG31778                                                       | 4.13        | 0.00002            | 0.00326          |
| 27: E-22        | CG3533                   | unzipped                                                      | 4.05        | 0.00000            | 0.00114          |
| 13: I-11        | CG13335                  | CG13335                                                       | 4           | 0.00001            | 0.00281          |
| 33: F-22        | CG12660                  | retinal degeneration A                                        | 3.91        | 0.00036            | 0.01130          |
| 18: J-10        | CG7135                   | CG7135                                                        | 3.83        | 0.00001            | 0.00281          |
| 19: O-11        | CG8539                   | CG8539                                                        | 3.77        | 0.00008            | 0.00623          |
| 24: G-22        | CG14994                  | glutamic acid decarboxylase 1                                 | 3.75        | 0.00119            | 0.02000          |
| 13: F-21        | CG13086                  | CG13086                                                       | 3.68        | 0.00003            | 0.00418          |
| 14: J-10        | CG16777                  | CG16777                                                       | 3.64        | 0.00018            | 0.00779          |
| 06: B-12        | CG9372                   | CG9372                                                        | 3.64        | 0.00050            | 0.01280          |
| 07: B-12        | CG6571                   | retinal degeneration C                                        | 3.57        | 0.00074            | 0.01540          |
| 38: N-23        | CG7722                   | serpin 47C                                                    | 3.56        | 0.00009            | 0.00627          |
| 04: F-23        | CG3159                   | excitatory amino acid transporter 2                           | 3.52        | 0.00005            | 0.00426          |
| 20: J-22        | CG18214                  | trio                                                          | 3.49        | 0.00001            | 0.00281          |
| 05: G-23        | CG11206                  | liprin- $\gamma$                                              | 3.47        | 0.00039            | 0.01180          |
| 28: N-20        | CG30492                  | CG30492                                                       | 3.43        | 0.00270            | 0.03200          |
| 24: F-23        | CG33203                  | CG33203                                                       | 3.43        | 0.00131            | 0.02080          |
| 30: F-10        | CG12023                  | GV1                                                           | 3.39        | 0.00001            | 0.00282          |
| 32: A-11        | CG31706                  | CG31706                                                       | 3.39        | 0.00001            | 0.00281          |
| 39: N-09        | CG32169                  | RNA-binding protein 6                                         | 3.38        | 0.00002            | 0.00326          |
| 33: F-23        | CG11387                  | cut                                                           | 3.36        | 0.00077            | 0.01560          |
| 31: C-23        | CG1299                   | CG1299                                                        | 3.36        | 0.00043            | 0.01230          |
| 34: I-23        | CG31217                  | modular serine protease                                       | 3.35        | 0.00002            | 0.00326          |
| 16: B-11        | CG12269                  | CG12269                                                       | 3.32        | 0.00020            | 0.00793          |
| 09: N-23        | CG14275                  | CG14275                                                       | 3.32        | 0.00016            | 0.00779          |
| 16: F-24        | CG32800                  | CG32800                                                       | 3.3         | 0.00028            | 0.00961          |
| 26: F-22        | CG8086                   | CG8086                                                        | 3.29        | 0.00008            | 0.00623          |
| 11: F-08        | CG10047                  | synaptotagmin 4                                               | 3.27        | 0.00288            | 0.03320          |
| 36: I-11        | CG18598                  | CG18598                                                       | 3.26        | 0.00038            | 0.01170          |
| 29: J-24        | CR32646                  | CR32646                                                       | 3.26        | 0.00066            | 0.01460          |
| 40: K-11        | CG4409                   | CG4409                                                        | 3.24        | 0.00051            | 0.01280          |
| 06: N-12        | CG9511                   | CG9511                                                        | 3.24        | 0.00013            | 0.00708          |
| 06: H-12        | CG9441                   | punch                                                         | 3.21        | 0.00866            | 0.06610          |
| 03: C-11        | CG17117                  | homothorax                                                    | 3.2         | 0.00152            | 0.02310          |
| 11: N-21        | CG9631                   | CG9631                                                        | 3.19        | 0.00047            | 0.01260          |
| 04: I-12        | CG30019                  | CG30019                                                       | 3.18        | 0.00245            | 0.03070          |
| 12: G-23        | CG7921                   | Mgat2                                                         | 3.16        | 0.00051            | 0.01280          |
| 12: F-20        | CG30151                  | CG30151                                                       | 3.15        | 0.00011            | 0.00653          |

|          |         |                                           |      |         |         |
|----------|---------|-------------------------------------------|------|---------|---------|
| 36: K-10 | CG30052 | odorant-binding protein 49a               | 3.1  | 0.00164 | 0.02460 |
| 13: A-10 | CG14528 | CG14528                                   | 3.08 | 0.00011 | 0.00653 |
| 09: B-10 | CG5387  | Cdk5 $\alpha$                             | 3.08 | 0.00031 | 0.01050 |
| 19: J-21 | CG6329  | CG6329                                    | 3.04 | 0.00024 | 0.00872 |
| 05: K-24 | CG31160 | CG31160                                   | 3.02 | 0.00086 | 0.01660 |
| 29: E-22 | CG6438  | amontillado                               | 3    | 0.00183 | 0.02600 |
| 17: K-09 | CG7203  | CG7203                                    | 3    | 0.00028 | 0.00961 |
| 29: K-11 | CG14032 | Cyp4ac1                                   | 2.98 | 0.00855 | 0.06600 |
| 24: M-11 | CG2381  | Syt7                                      | 2.98 | 0.00002 | 0.00329 |
| 26: I-23 | CG6282  | oxidoreductase activity                   | 2.97 | 0.00080 | 0.01600 |
| 10: F-24 | CG6698  | NtR                                       | 2.96 | 0.00339 | 0.03660 |
| 15: L-12 | CG1889  | CG1889                                    | 2.95 | 0.00846 | 0.06560 |
| 24: G-09 | CG2239  | jdp                                       | 2.94 | 0.00455 | 0.04470 |
| 40: B-10 | CG14132 | CG14132                                   | 2.91 | 0.00048 | 0.01270 |
| 03: F-11 | CG3966  | neither inactivation nor afterpotential A | 2.91 | 0.00130 | 0.02080 |
| 36: K-11 | CG18673 | CG18673                                   | 2.88 | 0.00070 | 0.01490 |
| 28: O-10 | CG14904 | Sarcoplasmic calcium-binding protein 2    | 2.86 | 0.00259 | 0.03180 |
| 30: I-23 | CG15203 | CG15203                                   | 2.86 | 0.00004 | 0.00426 |
| 27: G-22 | CG3566  | CG3566                                    | 2.85 | 0.00319 | 0.03570 |
| 08: G-11 | CG8295  | myelodysplasia/myeloid leukemia factor    | 2.85 | 0.00273 | 0.03200 |
| 05: D-22 | CG5073  | CG5073                                    | 2.82 | 0.00430 | 0.04320 |
| 08: N-22 | CG32019 | bent                                      | 2.8  | 0.00006 | 0.00525 |
| 26: I-06 | CG4783  | CG4783                                    | 2.8  | 0.00019 | 0.00779 |
| 39: M-22 | CG7052  | thiolester containing protein II          | 2.8  | 0.00069 | 0.01480 |
| 15: I-23 | CG9347  | neither inactivation nor afterpotential B | 2.8  | 0.00015 | 0.00759 |
| 22: F-08 | CG13833 | CG13833                                   | 2.77 | 0.00245 | 0.03070 |
| 24: C-23 | CG2194  | suppressor of rudimentary                 | 2.77 | 0.00283 | 0.03290 |
| 18: E-23 | CG3244  | C-type lectin 27kD                        | 2.76 | 0.00004 | 0.00418 |
| 29: C-09 | CG13908 | CG13908                                   | 2.74 | 0.00335 | 0.03640 |
| 34: B-24 | CG4356  | muscarinic Acetylcholine Receptor 60C     | 2.74 | 0.00502 | 0.04630 |
| 27: F-23 | CG9813  | CG9813                                    | 2.74 | 0.00303 | 0.03420 |
| 18: M-21 | CG32523 | CG32523                                   | 2.72 | 0.00966 | 0.07060 |
| 03: P-10 | CG5577  | CG5577                                    | 2.72 | 0.00794 | 0.06260 |
| 40: H-07 | CG9629  | CG9629                                    | 2.71 | 0.00115 | 0.01970 |
| 08: N-23 | CG16978 | CG16978                                   | 2.7  | 0.00413 | 0.04240 |
| 22: C-11 | CG14567 | CG14567                                   | 2.69 | 0.00042 | 0.01230 |
| 12: A-22 | CG10205 | CG10205                                   | 2.61 | 0.00394 | 0.04170 |
| 41: K-09 | CG4660  | CG4660                                    | 2.59 | 0.00200 | 0.02710 |
| 16: A-23 | CG4894  | Ca- $\alpha$ 1D                           | 2.59 | 0.00139 | 0.02150 |
| 05: F-09 | CG6027  | center divider                            | 2.59 | 0.00004 | 0.00426 |
| 35: J-08 | CG8896  | 18 wheeler,immune response                | 2.59 | 0.00016 | 0.00779 |
| 23: N-08 | CG5249  | blimp-1                                   | 2.58 | 0.00972 | 0.07060 |
| 24: N-24 | CG9338  | CG9338                                    | 2.56 | 0.00189 | 0.02620 |
| 32: B-24 | CG11147 | CG11147                                   | 2.54 | 0.00675 | 0.05530 |
| 31: H-12 | CG4501  | bubblegum                                 | 2.51 | 0.00323 | 0.03570 |
| 11: B-22 | CG10011 | CG10011                                   | 2.49 | 0.00003 | 0.00418 |
| 10: K-11 | CG11062 | activin- $\beta$                          | 2.48 | 0.00322 | 0.03570 |
| 40: I-07 | CG4325  | CG4325                                    | 2.48 | 0.00047 | 0.01260 |
| 21: F-23 | CG4432  | Peptidoglycan recognition protein LC      | 2.48 | 0.00098 | 0.01810 |
| 10: B-23 | CG1969  | CG1969                                    | 2.47 | 0.00103 | 0.01850 |

|          |         |                                        |      |         |         |
|----------|---------|----------------------------------------|------|---------|---------|
| 24: A-07 | CG2155  | vermillion                             | 2.47 | 0.00479 | 0.04490 |
| 27: G-23 | CG3772  | cryptochrome                           | 2.47 | 0.00823 | 0.06410 |
| 38: K-10 | CG4259  | CG4259                                 | 2.46 | 0.00264 | 0.03200 |
| 08: M-22 | CG5744  | frequenin 1                            | 2.46 | 0.00143 | 0.02190 |
| 15: J-09 | CG7365  | CG7365                                 | 2.46 | 0.00056 | 0.01340 |
| 27: C-22 | CG3505  | CG3505                                 | 2.44 | 0.00561 | 0.04890 |
| 32: H-20 | CG11241 | CG11241                                | 2.42 | 0.00062 | 0.01390 |
| 06: J-11 | CG11641 | pou domain motif 3                     | 2.42 | 0.00005 | 0.00426 |
| 38: F-21 | CG6356  | CG6356                                 | 2.42 | 0.00066 | 0.01460 |
| 06: F-12 | CG9427  | CG9427                                 | 2.4  | 0.00228 | 0.02950 |
| 32: N-23 | CG1632  | CG1632                                 | 2.39 | 0.00185 | 0.02600 |
| 12: J-22 | CG30190 | CG30190                                | 2.39 | 0.00053 | 0.01290 |
| 11: N-20 | CG10137 | CG10137                                | 2.37 | 0.00270 | 0.03200 |
| 34: M-12 | CG13607 | CG13607                                | 2.37 | 0.00652 | 0.05440 |
| 41: G-23 | CG4629  | CG4629                                 | 2.37 | 0.00572 | 0.04920 |
| 34: B-09 | CG1448  | innexin 3, gap junction channel        | 2.35 | 0.00086 | 0.01660 |
| 20: I-22 | CG1092  | CG1092                                 | 2.33 | 0.00128 | 0.02060 |
| 32: F-21 | CG15855 | ecdysone-induced protein 63F 1         | 2.33 | 0.00139 | 0.02150 |
| 08: C-09 | CG8245  | CG8245                                 | 2.31 | 0.00619 | 0.05230 |
| 11: A-23 | CG12187 | CG8245                                 | 2.29 | 0.00019 | 0.00779 |
| 33: F-12 | CG12643 | CG8245                                 | 2.29 | 0.00396 | 0.04170 |
| 15: I-22 | CG13845 | CG8245                                 | 2.29 | 0.00173 | 0.02570 |
| 14: C-23 | CG8733  | Cyp305a1                               | 2.29 | 0.00435 | 0.04350 |
| 38: G-22 | CG4220  | elbow B                                | 2.28 | 0.00091 | 0.01700 |
| 30: F-08 | CG12023 | GV1                                    | 2.27 | 0.00463 | 0.04480 |
| 21: J-20 | CG40041 | glycoprotein hormone beta 5            | 2.27 | 0.00036 | 0.01130 |
| 05: A-23 | CG10361 | CG10361                                | 2.26 | 0.00203 | 0.02720 |
| 38: C-11 | CG17594 | scarecrow                              | 2.25 | 0.00405 | 0.04200 |
| 31: H-10 | CG4500  | CG4500                                 | 2.25 | 0.00953 | 0.07040 |
| 23: O-23 | CG6912  | CG6912                                 | 2.25 | 0.00109 | 0.01920 |
| 36: C-09 | CG1819  | CG1819                                 | 2.23 | 0.00469 | 0.04480 |
| 30: B-21 | CG1998  | CG1998                                 | 2.23 | 0.00477 | 0.04490 |
| 35: F-21 | CG11821 | Cyp12a5                                | 2.2  | 0.00053 | 0.01290 |
| 33: K-11 | CG15658 | CG15658                                | 2.2  | 0.00012 | 0.00669 |
| 10: G-09 | CG11010 | equilibrative nucleoside transporter 3 | 2.18 | 0.00473 | 0.04480 |
| 28: H-12 | CG30418 | nord                                   | 2.18 | 0.00184 | 0.02600 |
| 24: L-11 | CG33261 | CG33261                                | 2.18 | 0.00552 | 0.04890 |
| 03: N-22 | CG5562  | glass bottom boat                      | 2.16 | 0.00060 | 0.01380 |
| 12: J-21 | CG15661 | CG15661                                | 2.15 | 0.00320 | 0.03570 |
| 10: C-24 | CG18375 | CG18375                                | 2.15 | 0.00179 | 0.02590 |
| 12: N-24 | CG30289 | CG30289                                | 2.15 | 0.00125 | 0.02040 |
| 34: A-23 | CG31145 | CG31145                                | 2.15 | 0.00558 | 0.04890 |
| 13: I-08 | CG14630 | CG14630                                | 2.13 | 0.00072 | 0.01520 |
| 33: C-21 | CG15553 | CG15553                                | 2.12 | 0.00078 | 0.01580 |
| 38: O-22 | CG4330  | CG4330                                 | 2.11 | 0.00560 | 0.04890 |
| 19: J-10 | CG9170  | CG9170                                 | 2.11 | 0.00222 | 0.02890 |
| 11: H-24 | CG10079 | EGFR                                   | 2.1  | 0.00573 | 0.04920 |
| 37: L-15 | CG9119  | CG9119                                 | 2.1  | 0.00121 | 0.02000 |
| 25: B-11 | CG10353 | CG10353                                | 2.09 | 0.00873 | 0.06610 |
| 28: J-11 | CG12090 | CG12090                                | 2.08 | 0.00418 | 0.04240 |

|          |         |                                                   |      |         |         |
|----------|---------|---------------------------------------------------|------|---------|---------|
| 08: E-10 | CG5646  | CG5646                                            | 2.08 | 0.00035 | 0.01120 |
| 12: G-24 | CG11066 | scarface                                          | 2.07 | 0.00473 | 0.04480 |
| 10: K-10 | CG18507 | CG18507                                           | 2.07 | 0.00544 | 0.04880 |
| 07: O-11 | CG5939  | paramyosin                                        | 2.07 | 0.00273 | 0.03200 |
| 30: P-18 | CG12139 | CG12139                                           | 2.05 | 0.00456 | 0.04470 |
| 12: G-22 | CG1102  | melanization Protease 1                           | 2.04 | 0.00905 | 0.06820 |
| 21: E-22 | CG11388 | CG11388                                           | 2.04 | 0.00041 | 0.01230 |
| 30: E-22 | CG4139  | karl                                              | 2.04 | 0.00872 | 0.06610 |
| 03: J-12 | CG5501  | myosin 95E                                        | 2.04 | 0.00259 | 0.03180 |
| 24: C-11 | CG2177  | CG2177                                            | 2.03 | 0.00050 | 0.01280 |
| 38: L-11 | CG7152  | syntrophin-like 1                                 | 2.03 | 0.00659 | 0.05450 |
| 31: N-21 | CG3556  | CG3556                                            | 2.02 | 0.00707 | 0.05720 |
| 25: N-22 | CG10698 | GRHRII                                            | 2.01 | 0.00103 | 0.01850 |
| 38: K-09 | CG1770  | HDAC4                                             | 2    | 0.00211 | 0.02770 |
| 19: C-07 | CG8193  | CG8193                                            | 2    | 0.00108 | 0.01910 |
| 27: L-10 | CG8547  | CG8547                                            | 2    | 0.00536 | 0.04830 |
| 11: F-10 | CG1004  | rhomboid                                          | 1.98 | 0.00017 | 0.00779 |
| 06: N-08 | CG9508  | CG9508                                            | 1.98 | 0.00603 | 0.05120 |
| 32: D-12 | CG11158 | CG11158                                           | 1.97 | 0.00656 | 0.05440 |
| 18: D-10 | CG6124  | eater                                             | 1.96 | 0.00052 | 0.01290 |
| 26: F-20 | CG8086  | CG8086                                            | 1.95 | 0.00557 | 0.04890 |
| 06: B-24 | CG9384  | CG9384                                            | 1.94 | 0.00705 | 0.05720 |
| 37: A-11 | CG1689  | lozenge                                           | 1.93 | 0.00998 | 0.07120 |
| 24: M-23 | CG2457  | inaF-D                                            | 1.93 | 0.00044 | 0.01230 |
| 20: B-23 | CG30084 | Z band alternatively spliced PDZ-motif protein 52 | 1.93 | 0.00245 | 0.03070 |
| 17: H-10 | CG12529 | zwischenferment                                   | 1.92 | 0.00294 | 0.03340 |
| 27: F-22 | CG8486  | CG8486                                            | 1.91 | 0.00270 | 0.03200 |
| 04: F-11 | CG31555 | CG31555                                           | 1.9  | 0.00087 | 0.01660 |
| 08: E-24 | CG5661  | semaphorin-5c                                     | 1.9  | 0.00947 | 0.07040 |
| 37: I-11 | CG16987 | dawdle                                            | 1.89 | 0.00397 | 0.04170 |
| 23: N-21 | CG3413  | windpipe                                          | 1.89 | 0.00239 | 0.03060 |
| 05: N-21 | CG6139  | CG6139                                            | 1.89 | 0.00749 | 0.05960 |
| 08: M-23 | CG8384  | groucho                                           | 1.89 | 0.00112 | 0.01960 |
| 28: J-10 | CG30438 | CG30438                                           | 1.88 | 0.00328 | 0.03600 |
| 27: E-24 | CG3534  | CG3534                                            | 1.88 | 0.00175 | 0.02570 |
| 24: K-22 | CG15029 | CG15029                                           | 1.87 | 0.00474 | 0.04480 |
| 21: F-11 | CG4276  | arouser                                           | 1.87 | 0.00208 | 0.02760 |
| 24: P-06 | CG9342  | microsomal triacylglycerol transfer protein       | 1.87 | 0.00451 | 0.04460 |
| 24: D-09 | CG33181 | CG33181                                           | 1.84 | 0.00442 | 0.04400 |
| 04: N-11 | CG31664 | CG31664                                           | 1.83 | 0.00872 | 0.06610 |
| 36: D-08 | CG7084  | CG7084                                            | 1.81 | 0.00921 | 0.06920 |
| 17: L-20 | CG1271  | CG1271                                            | 1.79 | 0.00710 | 0.05720 |
| 40: N-12 | CG14430 | boudin (bou)                                      | 1.79 | 0.00533 | 0.04820 |
| 26: K-21 | CG6304  | CG6304                                            | 1.77 | 0.00973 | 0.07060 |
| 25: N-23 | CG10534 | Lcp65Ag2                                          | 1.76 | 0.00934 | 0.06990 |
| 19: M-11 | CG8461  | CG8461                                            | 0.57 | 0.00788 | 0.06240 |
| 11: L-24 | CG10120 | malic enzyme                                      | 0.56 | 0.00996 | 0.07120 |
| 17: G-23 | CG7175  | CG7175                                            | 0.56 | 0.00653 | 0.05440 |
| 14: A-09 | CG8597  | lark                                              | 0.56 | 0.00951 | 0.07040 |
| 41: G-21 | CG4626  | frizzled 4                                        | 0.55 | 0.00493 | 0.04570 |

|          |         |                                               |      |         |         |
|----------|---------|-----------------------------------------------|------|---------|---------|
| 36: D-14 | CG7130  | heat shock protein binding                    | 0.55 | 0.00378 | 0.04050 |
| 38: E-22 | CG4206  | minichromosome maintenance 3                  | 0.54 | 0.00512 | 0.04700 |
| 04: L-24 | CG12505 | Arc1                                          | 0.53 | 0.00624 | 0.05250 |
| 36: A-04 | CG17295 | reduction in Cnn dots 4                       | 0.53 | 0.00471 | 0.04480 |
| 20: F-08 | CG18107 | CG18107                                       | 0.53 | 0.00489 | 0.04550 |
| 32: M-10 | CG17054 | CG17054                                       | 0.52 | 0.00523 | 0.04770 |
| 08: M-11 | CG8369  | CG8369                                        | 0.52 | 0.00864 | 0.06610 |
| 23: O-01 | CG6891  | CG6891                                        | 0.51 | 0.00186 | 0.02600 |
| 10: F-21 | CG2023  | CG2023                                        | 0.48 | 0.00046 | 0.01260 |
| 22: I-22 | CG31938 | Rrp40                                         | 0.48 | 0.00176 | 0.02570 |
| 22: K-22 | CG32023 | CG32023                                       | 0.48 | 0.00821 | 0.06410 |
| 05: B-10 | CG5041  | Tfb4                                          | 0.48 | 0.00558 | 0.04890 |
| 24: D-14 | CG9211  | interference Hedgehog                         | 0.48 | 0.00419 | 0.04240 |
| 25: K-11 | CG10387 | tosca                                         | 0.47 | 0.00981 | 0.07090 |
| 20: E-22 | CG1078  | Fip1                                          | 0.47 | 0.00183 | 0.02600 |
| 17: M-10 | CG3319  | cyclin-dependent kinase 7                     | 0.47 | 0.00116 | 0.01970 |
| 12: G-10 | CG10965 | companion of reaper                           | 0.46 | 0.00573 | 0.04920 |
| 04: E-11 | CG1675  | CG1675                                        | 0.46 | 0.00020 | 0.00793 |
| 20: F-10 | CG18108 | immune induced molecule 1                     | 0.46 | 0.00417 | 0.04240 |
| 39: N-21 | CG3217  | CKII-alpha subunit interactor-3               | 0.46 | 0.00380 | 0.04060 |
| 20: B-24 | CG18067 | CG18067                                       | 0.45 | 0.00710 | 0.05720 |
| 20: N-10 | CG1825  | microtubule-associated protein 60             | 0.45 | 0.00467 | 0.04480 |
| 26: C-16 | CG4740  | attacin-C                                     | 0.45 | 0.00414 | 0.04240 |
| 20: M-22 | CG11100 | Mes2                                          | 0.44 | 0.00197 | 0.02710 |
| 16: N-09 | CG14125 | CG14125                                       | 0.44 | 0.00089 | 0.01670 |
| 40: I-03 | CG4312  | metallothionein B                             | 0.44 | 0.00294 | 0.03340 |
| 20: I-12 | CG10911 | CG10911                                       | 0.43 | 0.00579 | 0.04950 |
| 25: E-24 | CG14375 | CCHamide-2                                    | 0.43 | 0.00154 | 0.02320 |
| 17: M-22 | CG33250 | AlkB                                          | 0.43 | 0.00035 | 0.01120 |
| 11: J-09 | CG9494  | tetraspanin 29Fa                              | 0.43 | 0.00589 | 0.05020 |
| 34: I-22 | CG13570 | spaghetti                                     | 0.42 | 0.00017 | 0.00779 |
| 14: N-20 | CG16844 | immune induced molecule 3                     | 0.42 | 0.00019 | 0.00779 |
| 33: I-24 | CG32796 | brother of iHog                               | 0.42 | 0.00201 | 0.02710 |
| 06: M-22 | CG5399  | CG5399                                        | 0.42 | 0.00724 | 0.05810 |
| 23: I-11 | CG6833  | CG6833                                        | 0.42 | 0.00334 | 0.03640 |
| 39: B-07 | CG32041 | Hsp22                                         | 0.41 | 0.00212 | 0.02770 |
| 19: O-21 | CG8577  | PGRP-SC1b                                     | 0.41 | 0.00268 | 0.03200 |
| 05: I-21 | CG11381 | CG11381                                       | 0.4  | 0.00967 | 0.07060 |
| 32: F-11 | CG15835 | histone demethylase 4A                        | 0.4  | 0.00043 | 0.01230 |
| 15: B-12 | CG18628 | CG18628                                       | 0.4  | 0.00525 | 0.04770 |
| 08: I-11 | CG8319  | CG8319                                        | 0.4  | 0.00024 | 0.00872 |
| 36: N-23 | CG8767  | mos                                           | 0.4  | 0.00128 | 0.02060 |
| 19: F-09 | CG6137  | aubergine                                     | 0.39 | 0.00018 | 0.00779 |
| 22: I-23 | CG14781 | meiotic 38                                    | 0.37 | 0.00102 | 0.01850 |
| 04: B-11 | CG31517 | CG31517                                       | 0.37 | 0.00244 | 0.03070 |
| 40: B-21 | CG9576  | CG9576                                        | 0.37 | 0.00957 | 0.07050 |
| 35: I-11 | CG9135  | CG9135                                        | 0.35 | 0.00200 | 0.02710 |
| 27: O-11 | CG3868  | CG3868                                        | 0.34 | 0.00133 | 0.02080 |
| 27: E-11 | CG3738  | cyclin-dependent kinase subunit 30A           | 0.32 | 0.00057 | 0.01350 |
| 24: F-10 | CG9241  | sensitized chromosome inheritance modifier 19 | 0.32 | 0.00081 | 0.01610 |

|          |         |                                 |       |         |         |
|----------|---------|---------------------------------|-------|---------|---------|
| 24: B-11 | CG33166 | stem cell tumor                 | 0.3   | 0.00022 | 0.00827 |
| 39: E-11 | CG32282 | drosomycin-4                    | 0.29  | 0.00799 | 0.06270 |
| 28: O-11 | CG10336 | response to DNA damage stimulus | 0.27  | 0.00017 | 0.00779 |
| 14: J-08 | CG16775 | CG16775                         | 0.27  | 0.00010 | 0.00627 |
| 26: C-12 | CG4734  | CG4734                          | 0.27  | 0.00665 | 0.05470 |
| 12: C-12 | CG10308 | Cyclin J                        | 0.26  | 0.00087 | 0.01660 |
| 21: J-10 | CG3994  | ZnT35C                          | 0.25  | 0.00022 | 0.00827 |
| 13: E-11 | CG13299 | CG13299                         | 0.24  | 0.00029 | 0.00970 |
| 27: B-10 | CG8420  | CG8420                          | 0.23  | 0.00068 | 0.01480 |
| 36: F-24 | CG7242  | Spc25                           | 0.22  | 0.00260 | 0.03180 |
| 33: B-09 | CG11330 | cortex                          | 0.21  | 0.00004 | 0.00418 |
| 07: F-22 | CG6620  | IplI-aurora-like kinase         | 0.2   | 0.00115 | 0.01970 |
| 24: B-12 | CG9188  | septin interacting protein 2    | 0.2   | 0.00121 | 0.02000 |
| 37: J-22 | CG13083 | CG13083                         | 0.19  | 0.00009 | 0.00627 |
| 20: A-23 | CG7670  | WRN exonuclease                 | 0.16  | 0.00007 | 0.00566 |
| 23: E-14 | CG10794 | diptericin B                    | 0.12  | 0.00074 | 0.01540 |
| 23: G-10 | CG10810 | drosomycin                      | 0.11  | 0.00745 | 0.05940 |
| 39: E-09 | CG32274 | drosomycin-like                 | 0.078 | 0.00285 | 0.03300 |
| 19: C-01 | CG8175  | metchnikowin                    | 0.073 | 0.00001 | 0.00326 |

<sup>a,b</sup>Gene symbol and name are based on the information in the flybase, [www.flybase.org](http://www.flybase.org).

<sup>d</sup>FDR, false discovery rate.

**Table S6. The List of GO Categories Significantly Changed by ATPsyn-d Knockdown in Flies Fed SY1:9, Related to Figure 3**

| Gene ontology category | Unique array id | Gene symbol <sup>a</sup>      | Gene name <sup>b</sup>                    | Fold-change | Parametric p-value | FDR <sup>c</sup> |
|------------------------|-----------------|-------------------------------|-------------------------------------------|-------------|--------------------|------------------|
| GO 23052               | 11: F-10        | CG1004                        | rhomboid                                  | 1.98        | 0.00017            | 0.00779          |
| Signaling              | 11: F-08        | CG10047                       | synaptotagmin 4                           | 3.27        | 0.00288            | 0.03320          |
|                        | 11: H-24        | CG10079                       | EGFR                                      | 2.10        | 0.00573            | 0.04920          |
|                        | 25: N-22        | CG10698                       | GRHRII                                    | 2.01        | 0.00103            | 0.01850          |
|                        | 14: N-20        | CG16844                       | immune induced molecule 3                 | 0.42        | 0.00019            | 0.00779          |
|                        | 37: A-11        | CG1689                        | lozenge                                   | 1.93        | 0.00998            | 0.07120          |
|                        | 37: I-11        | CG16987                       | dawdle                                    | 1.89        | 0.00397            | 0.04170          |
|                        | 20: B-24        | CG18067                       | CG18067                                   | 0.45        | 0.00710            | 0.05720          |
|                        | 20: J-22        | CG18214                       | Trio                                      | 3.49        | 0.00001            | 0.00281          |
|                        | 15: L-12        | CG1889                        | CG1889                                    | 2.95        | 0.00846            | 0.06560          |
|                        | 24: M-11        | CG2381                        | Syt7                                      | 2.98        | 0.00002            | 0.00329          |
|                        | 24: M-23        | CG2457                        | inaF-D                                    | 1.93        | 0.00044            | 0.01230          |
|                        | 33: I-24        | CG32796                       | brother of iHog                           | 0.42        | 0.00201            | 0.02710          |
|                        | 24: B-11        | CG33166                       | stem cell tumor                           | 0.30        | 0.00022            | 0.00827          |
|                        | 27: G-23        | CG3772                        | cryptochrome                              | 2.47        | 0.00823            | 0.06410          |
|                        | 03: F-11        | CG3966                        | neither inactivation nor afterpotential A | 2.91        | 0.00130            | 0.02080          |
|                        | 14: J-23        | CG40306                       | stoned A                                  | 5.54        | 0.00012            | 0.00664          |
|                        | 38: G-22        | CG4220                        | elbow B                                   | 2.28        | 0.00091            | 0.01700          |
|                        | 21: F-11        | CG4276                        | arouser                                   | 1.87        | 0.00208            | 0.02760          |
|                        | 34: B-24        | CG4356                        | muscarinic Acetylcholine Receptor 60C     | 2.74        | 0.00502            | 0.04630          |
|                        | 41: G-21        | CG4626                        | frizzled 4                                | 0.55        | 0.00493            | 0.04570          |
|                        | 03: N-22        | CG5562                        | glass bottom boat                         | 2.16        | 0.00060            | 0.01380          |
|                        | 08: M-22        | CG5744                        | frequenin 1                               | 2.46        | 0.00143            | 0.02190          |
|                        | 07: B-12        | CG6571                        | retinal degeneration C                    | 3.57        | 0.00074            | 0.01540          |
|                        | 35: J-08        | CG8896                        | 18 wheeler                                | 2.59        | 0.00016            | 0.00779          |
|                        | 24: D-14        | CG9211                        | interference Hedgehog                     | 0.48        | 0.00419            | 0.04240          |
|                        | 15: I-23        | CG9347                        | neither inactivation nor afterpotential B | 2.80        | 0.00015            | 0.00759          |
|                        | 12: G-10        | CG10965                       | companion of reaper                       | 0.46        | 0.00573            | 0.04920          |
| 21: M-24               | CG1168          | 7B2                           | 4.59                                      | 0.00058     | 0.01350            |                  |
| 24: G-22               | CG14994         | glutamic acid decarboxylase 1 | 3.75                                      | 0.00119     | 0.02000            |                  |
| GO 16491               | 11: L-24        | CG10120                       | malic enzyme                              | 0.56        | 0.00996            | 0.07120          |
| Oxidoreductase         | 35: F-21        | CG11821                       | Cyp12a5                                   | 2.20        | 0.00053            | 0.01290          |
|                        | 17: H-10        | CG12529                       | Zwischenferment                           | 1.92        | 0.00294            | 0.03340          |
|                        | 22: F-08        | CG13833                       | CG13833                                   | 2.77        | 0.00245            | 0.03070          |
|                        | 29: K-11        | CG14032                       | Cyp4ac1                                   | 2.98        | 0.00855            | 0.06600          |
|                        | 13: I-08        | CG14630                       | CG14630                                   | 2.13        | 0.00072            | 0.01520          |
|                        | 32: F-11        | CG15835                       | histone demethylase 4A                    | 0.40        | 0.00043            | 0.01230          |
|                        | 30: B-21        | CG1998                        | CG1998                                    | 2.23        | 0.00477            | 0.04490          |
|                        | 24: A-07        | CG2155                        | vermillion                                | 2.47        | 0.00479            | 0.04490          |
|                        | 24: C-23        | CG2194                        | suppressor of rudimentary                 | 2.77        | 0.00283            | 0.03290          |
|                        | 04: I-12        | CG30019                       | CG30019                                   | 3.18        | 0.00245            | 0.03070          |
|                        | 17: M-22        | CG33250                       | AlkB                                      | 0.43        | 0.00035            | 0.01120          |
|                        | 26: G-24        | CG4779                        | homogentisate 1,2-dioxygenase             | 4.55        | 0.00011            | 0.00653          |
|                        | 26: I-23        | CG6282                        | CG6282                                    | 2.97        | 0.00080            | 0.01600          |



|                  |          |         |                                           |      |         |         |
|------------------|----------|---------|-------------------------------------------|------|---------|---------|
|                  | 19: C-07 | CG8193  | CG8193                                    | 2.00 | 0.00108 | 0.01910 |
|                  | 14: C-23 | CG8733  | Cyp305a1                                  | 2.29 | 0.00435 | 0.04350 |
|                  | 15: I-23 | CG9347  | neither inactivation nor afterpotential B | 2.80 | 0.00015 | 0.00759 |
|                  | 40: H-07 | CG9629  | CG9629                                    | 2.71 | 0.00115 | 0.01970 |
| GO 6508          | 11: N-21 | CG9631  | CG9631                                    | 3.19 | 0.00047 | 0.01260 |
| Proteolysis      | 27: C-22 | CG3505  | no homolog                                | 2.44 | 0.00561 | 0.04890 |
|                  | 32: N-23 | CG1632  | CG1632                                    | 2.39 | 0.00185 | 0.02600 |
|                  | 32: I-11 | CG31778 | CG31778                                   | 4.13 | 0.00002 | 0.00326 |
|                  | 29: E-22 | CG6438  | amontillado                               | 3.00 | 0.00183 | 0.02600 |
|                  | 06: B-12 | CG9372  | CG9372                                    | 3.64 | 0.00050 | 0.01280 |
|                  | 12: G-24 | CG11066 | scarface                                  | 2.07 | 0.00473 | 0.04480 |
|                  | 31: C-23 | CG1299  | CG1299                                    | 3.36 | 0.00043 | 0.01230 |
|                  | 13: A-10 | CG14528 | CG14528                                   | 3.08 | 0.00011 | 0.00653 |
|                  | 12: G-22 | CG1102  | melanization Protease 1                   | 2.04 | 0.00905 | 0.06820 |
|                  | 34: I-23 | CG31217 | modular serine protease                   | 3.35 | 0.00002 | 0.00326 |
|                  | 18: M-21 | CG32523 | CG32523                                   | 2.72 | 0.00966 | 0.07060 |
|                  | 19: O-11 | CG8539  | CG8539                                    | 3.77 | 0.00008 | 0.00623 |
|                  | 12: N-24 | CG30289 | CG30289                                   | 2.15 | 0.00125 | 0.02040 |
|                  | 38: K-10 | CG4259  | CG4259                                    | 2.46 | 0.00264 | 0.03200 |
|                  | 11: F-10 | CG1004  | rhomboid                                  | 1.98 | 0.00017 | 0.00779 |
|                  | 33: B-09 | CG11330 | cortex                                    | 0.21 | 0.00004 | 0.00418 |
|                  | 27: E-11 | CG3738  | Cyclin-dependent kinase subunit 30A       | 0.32 | 0.00057 | 0.01350 |
| GO 6952          | 14: N-20 | CG16844 | immune induced molecule 3                 | 0.42 | 0.00019 | 0.00779 |
| Defense          | 39: M-22 | CG7052  | thiolester containing protein II          | 2.80 | 0.00069 | 0.01480 |
| response         | 26: C-16 | CG4740  | attacin-C                                 | 0.45 | 0.00414 | 0.04240 |
|                  | 20: F-10 | CG18108 | immune induced molecule 1                 | 0.46 | 0.00417 | 0.04240 |
|                  | 23: E-14 | CG10794 | diptericin B                              | 0.12 | 0.00074 | 0.01540 |
|                  | 19: C-01 | CG8175  | metchnikowin                              | 0.07 | 0.00001 | 0.00326 |
|                  | 23: G-10 | CG10810 | Drosomycin                                | 0.11 | 0.00745 | 0.05940 |
|                  | 35: J-08 | CG8896  | 18 wheeler                                | 2.59 | 0.00016 | 0.00779 |
|                  | 21: F-23 | CG4432  | peptidoglycan recognition protein LC      | 2.48 | 0.00098 | 0.01810 |
|                  | 34: I-23 | CG31217 | modular serine protease                   | 3.35 | 0.00002 | 0.00326 |
|                  | 12: G-22 | CG1102  | melanization Protease 1                   | 2.04 | 0.00905 | 0.06820 |
|                  | 19: O-21 | CG8577  | PGRP-SC1b                                 | 0.41 | 0.00268 | 0.03200 |
|                  | 39: E-11 | CG32282 | drosomycin-4                              | 0.29 | 0.00799 | 0.06270 |
|                  | 39: E-09 | CG32274 | drosomycin-like                           | 0.08 | 0.00285 | 0.03300 |
|                  | 37: A-11 | CG1689  | lozenge                                   | 1.93 | 0.00998 | 0.07120 |
| GO 9628          | 24: G-22 | CG14994 | glutamic acid decarboxylase 1             | 3.75 | 0.00119 | 0.02000 |
| Response to      | 24: M-23 | CG2457  | inaF-D                                    | 1.93 | 0.00044 | 0.01230 |
| abiotic stimulus | 39: B-07 | CG32041 | Hsp22                                     | 0.41 | 0.00212 | 0.02770 |
|                  | 27: G-23 | CG3772  | cryptochrome                              | 2.47 | 0.00823 | 0.06410 |
|                  | 03: F-11 | CG3966  | neither inactivation nor afterpotential A | 2.91 | 0.00130 | 0.02080 |
|                  | 14: J-23 | CG40306 | stoned A                                  | 5.54 | 0.00012 | 0.00664 |
|                  | 07: B-12 | CG6571  | retinal degeneration C                    | 3.57 | 0.00074 | 0.01540 |
|                  | 36: D-14 | CG7130  | heat shock protein binding                | 0.55 | 0.00378 | 0.04050 |
|                  | 15: I-23 | CG9347  | neither inactivation nor afterpotential B | 2.80 | 0.00015 | 0.00759 |

|                       |          |         |                                 |      |         |         |
|-----------------------|----------|---------|---------------------------------|------|---------|---------|
| GO 6259               | 28: O-11 | CG10336 | response to DNA damage stimulus | 0.27 | 0.00017 | 0.00779 |
| DNA metabolic process | 25: K-11 | CG10387 | tosca                           | 0.47 | 0.00981 | 0.07090 |
|                       | 22: I-23 | CG14781 | meiotic 38                      | 0.37 | 0.00102 | 0.01850 |
|                       | 27: G-23 | CG3772  | cryptochrome                    | 2.47 | 0.00823 | 0.06410 |
|                       | 38: E-22 | CG4206  | minichromosome maintenance 3    | 0.54 | 0.00512 | 0.04700 |
|                       | 05: B-10 | CG5041  | Tfb4                            | 0.48 | 0.00558 | 0.04890 |
|                       | 20: A-23 | CG7670  | WRN exonuclease                 | 0.16 | 0.00007 | 0.00566 |
|                       | 15: J-09 | CG7365  | phospholipase activity          | 2.46 | 0.00056 | 0.01340 |
| GO 8307               | 38: L-11 | CG7152  | syntrophin-like 1               | 2.03 | 0.00659 | 0.05450 |
| Muscle structure      | 08: N-22 | CG32019 | bent                            | 2.80 | 0.00006 | 0.00525 |
|                       | 07: O-11 | CG5939  | paramyosin                      | 2.07 | 0.00273 | 0.03200 |

<sup>a,b</sup>Gene symbol and name are based on the information in the flybase, [www.flybase.org](http://www.flybase.org).

<sup>c</sup>FDR, false discovery rate.

**Table S7. The Interaction between ATPsyn-d and TOR Signaling on Lifespan of Females, Related to Figure 5 and 6**

| Strain <sup>a</sup>       | SY diet <sup>b</sup> | Presence of RU486 <sup>c</sup> | Rapamycin feeding <sup>d</sup> | # of flies per trial | Mean lifespan±SE (d) <sup>e</sup> | Change of mean lifespan | p value <sup>l</sup> |
|---------------------------|----------------------|--------------------------------|--------------------------------|----------------------|-----------------------------------|-------------------------|----------------------|
| da-GSG/v104353;+/+        | SY1:1                | No RU486                       | –                              | 153                  | 25.5 ± 0.5                        |                         |                      |
| da-GSG/v104353;+/+        |                      | RU486                          | –                              | 154                  | 30.6 ± 0.7                        | 20.0% <sup>f</sup>      | <.0001               |
| da-GSG/+;UAS-Tsc2 /+      |                      | RU486                          | –                              | 93                   | 26.7 ± 0.8                        |                         |                      |
| da-GSG/v104353;UAS-Tsc2/+ |                      | RU486                          | –                              | 148                  | 26.0 ± 0.6                        | - 2.6% <sup>g</sup>     | 0.5017               |
| da-GSG/v104353;+/+        | SY1:9                | No RU486                       | –                              | 142                  | 13.7 ± 0.2                        |                         |                      |
| da-GSG/v104353;+/+        |                      | RU486                          | –                              | 147                  | 16.5 ± 0.4                        | 20.4% <sup>f</sup>      | <.0001               |
| da-GSG/+;UAS-Tsc2 /+      |                      | RU486                          | –                              | 127                  | 20.0 ± 0.4                        |                         |                      |
| da-GSG/v104353;UAS-Tsc2/+ |                      | RU486                          | –                              | 179                  | 19.9 ± 0.3                        | 0.5% <sup>g</sup>       | 0.8675               |
| da-GSG/v104353;+/+        | SY1:1                | No RU486                       | No Rapa                        | 253                  | 29.0±0.5                          |                         |                      |
|                           |                      | RU486                          | No Rapa                        | 268                  | 39.9±0.6                          | 37.6% <sup>h</sup>      | <0.0001              |
|                           |                      | No RU486                       | +Rapa                          | 258                  | 41.3±0.9                          | 42.5% <sup>i</sup>      | <0.0001              |
|                           |                      | RU486                          | +Rapa                          | 257                  | 30.8±0.7                          | -25.5% <sup>h</sup>     | <0.0001              |
| da-GSG/v104353;+/+        | SY1:9                | No RU486                       | No Rapa                        | 242                  | 20.1±0.3                          |                         |                      |
|                           |                      | RU486                          | No Rapa                        | 230                  | 22.5±0.4                          | 11.6% <sup>h</sup>      | <0.0001              |
|                           |                      | No RU486                       | +Rapa                          | 219                  | 28.9±0.7                          | 43.6% <sup>i</sup>      | <0.0001              |
|                           |                      | RU486                          | +Rapa                          | 233                  | 27.0±0.6                          | -6.7% <sup>h</sup>      | 0.00380              |

<sup>a</sup>"v104353" represents UAS-ATPsyn-d RNAi (line v104353).

<sup>b</sup>SY, sugar-yeast diet. The ratio of sugar to yeast is listed after "SY".

<sup>c</sup>The presence of RU486 refers to 200 µM RU486.

<sup>d</sup>The concentration of rapamycin was 200 µM.

<sup>e</sup>Lifespan is expressed as mean±Standard error (SE) in days (d).

<sup>f</sup>Percentage change was referenced to diet-matched da-GSG/v104353;+/+ flies without RU486 treatment.

<sup>g</sup>Percentage change was referenced to diet-matched da-GSG/+;UAS-Tsc2 /+ flies.

<sup>h</sup>Percentage changes were referenced to SY diet- and rapamycin feeding-matched reference flies without RU486 treatment.

<sup>i</sup>Percentage changes were referenced to SY diet- and RU486-matched flies without rapamycin feeding.

<sup>l</sup>P values were based on logrank test.
